# Supplementary material
Source: PubMed Central journal article supplement (PMC2763603)
Supplement: NIHMS91118-supplement-1_si_001.pdf [file NIHMS91118-supplement-1_si_001.pdf]

# Synthesis of PNA FRET Probes via an Orthogonally Protected Building Block for Post-Synthetic Labeling of PNAs at the 5-Position of U.

Bereket Y. Oquare and John-Stephen Taylor\*

Department of Chemistry, Washington University in St. Louis, One Brookings Drive,  
St. Louis, Missouri 63130

\*To whom correspondence should be addressed:

Department of Chemistry  
Campus Box 1134  
Washington University  
One Brookings Drive  
St. Louis, MO 63130  
email: taylor@wustl.edu

|                                                         | <u>Page</u> |
|---------------------------------------------------------|-------------|
| Figure S1. <sup>1</sup> H NMR spectrum of <b>3</b> .    | S2          |
| Figure S2. <sup>13</sup> C NMR spectrum of <b>3</b> .   | S3          |
| Figure S3. <sup>1</sup> H NMR spectrum of <b>4</b> .    | S4          |
| Figure S4. <sup>13</sup> C NMR spectrum of <b>4</b> .   | S5          |
| Figure S5. <sup>1</sup> H NMR spectrum of <b>5</b> .    | S6          |
| Figure S6. <sup>13</sup> C NMR spectrum of <b>5</b> .   | S7          |
| Figure S7. <sup>1</sup> H NMR spectrum of <b>6</b> .    | S8          |
| Figure S8. <sup>1</sup> H NMR spectrum of <b>7</b> .    | S9          |
| Figure S9. <sup>13</sup> C NMR spectrum of <b>7</b> .   | S10         |
| Figure S10. <sup>1</sup> H NMR spectrum of <b>11</b> .  | S11         |
| Figure S11. <sup>13</sup> C NMR spectrum of <b>11</b> . | S12         |
| Figure S12. <sup>1</sup> H NMR spectrum of <b>13</b> .  | S13         |
| Figure S13. <sup>13</sup> C NMR spectrum of <b>13</b> . | S14         |
| Figure S14. <sup>1</sup> H NMR spectrum of <b>14</b> .  | S15         |
| Figure S15. <sup>13</sup> C NMR spectrum of <b>14</b> . | S16         |
| Figure S16. <sup>1</sup> H NMR spectrum of <b>16</b> .  | S17         |
| Figure S17. <sup>13</sup> C NMR spectrum of <b>16</b> . | S18         |
| Figure S18. <sup>1</sup> H NMR spectrum of <b>8</b> .   | S19         |
| Figure S19. <sup>13</sup> C NMR spectrum of <b>8</b> .  | S20         |
| Figure S20. <sup>1</sup> H NMR spectrum of <b>10</b> .  | S21         |
| Figure S21. <sup>13</sup> C NMR spectrum of <b>10</b> . | S22         |
| Figure S22. <sup>1</sup> H NMR spectrum of <b>1</b> .   | S23         |
| Figure S23. <sup>13</sup> C NMR spectrum of <b>1</b> .  | S24         |

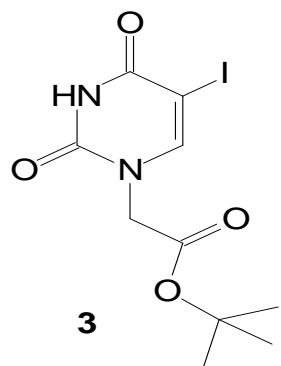

S2

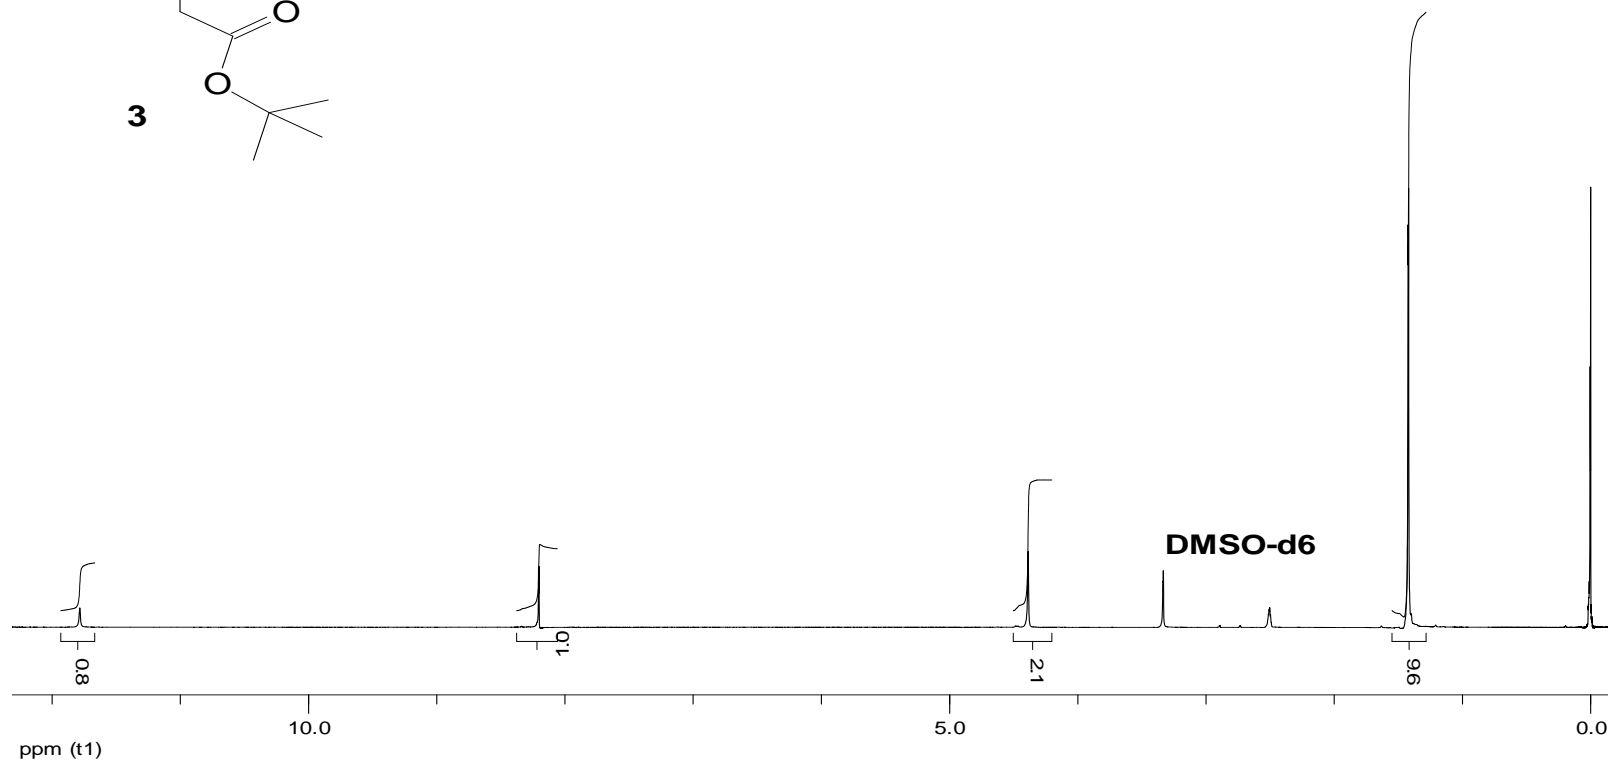

Figure S1.  $^1\text{H}$  NMR (300MHz,  $\text{DMSO-d}_6$ ) spectrum of tert-butyl 2-(5-iodo-2,4-dioxo-3,4-dihydropyrimidin-1(2H)-yl)acetate (3).



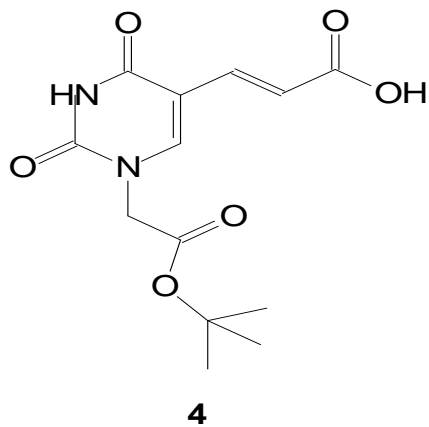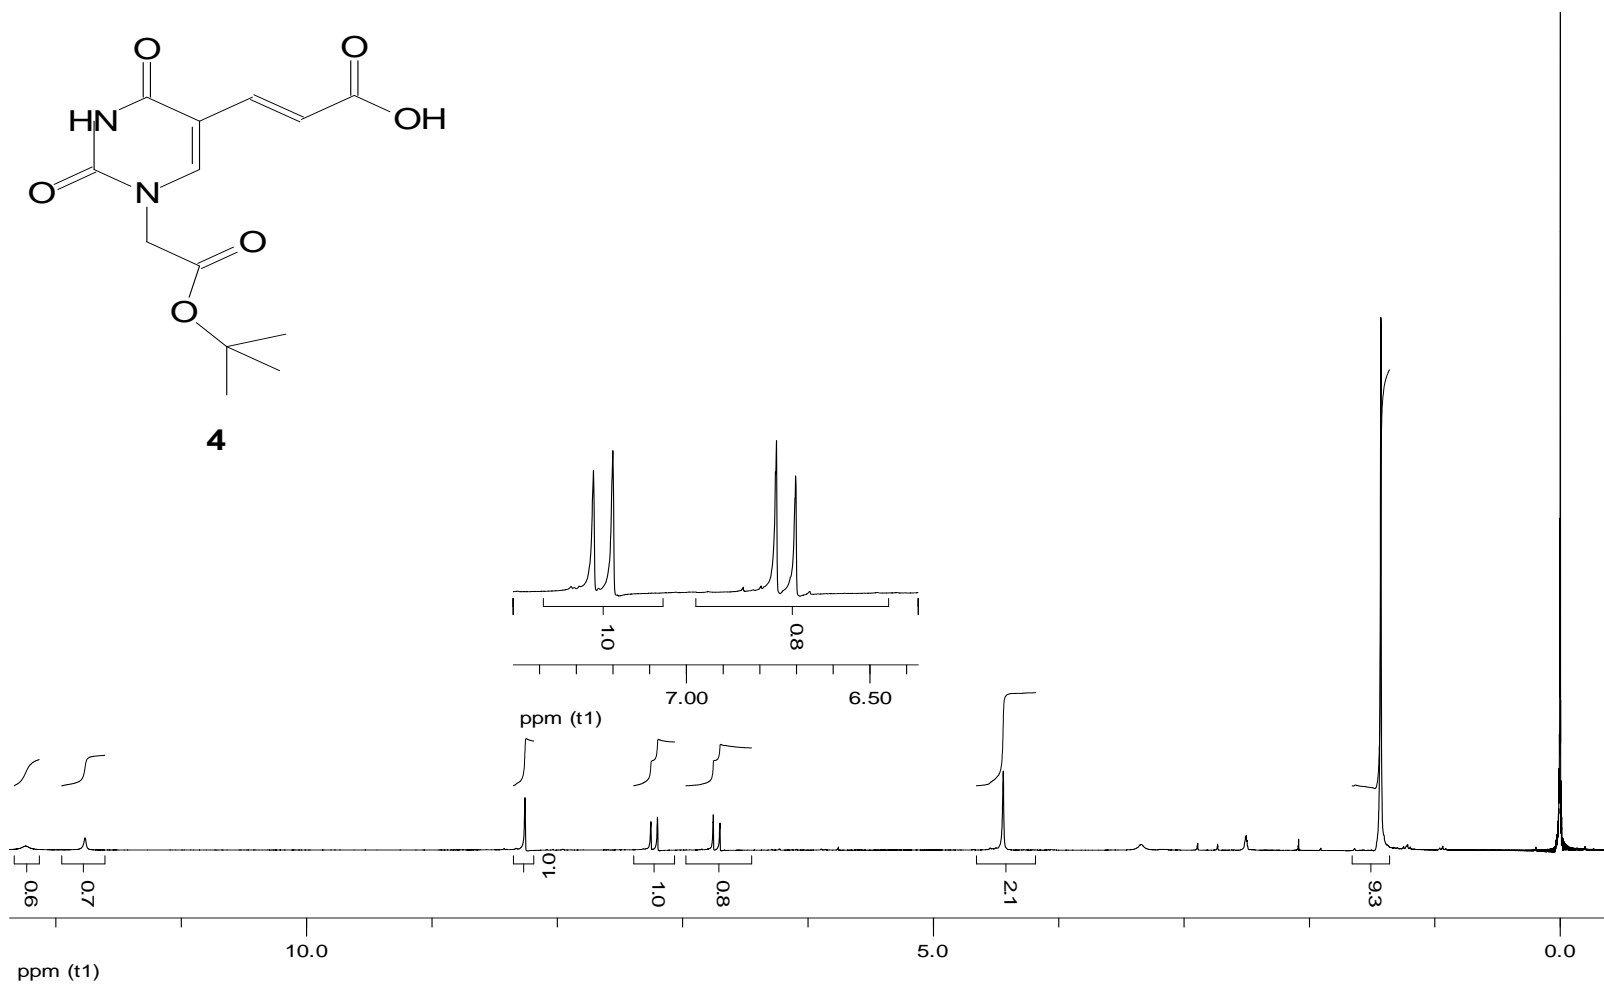

S4

**Figure 3.3**  $^1\text{H}$  NMR (300 MHz,  $\text{DMSO-d}_6$ ) spectrum of (E)-3-(1-(2-tert-butoxy-2-oxoethyl)-2,4-dioxo-1,2,3,4-tetrahydropyrimidin-5-yl)acrylic acid (**4**).

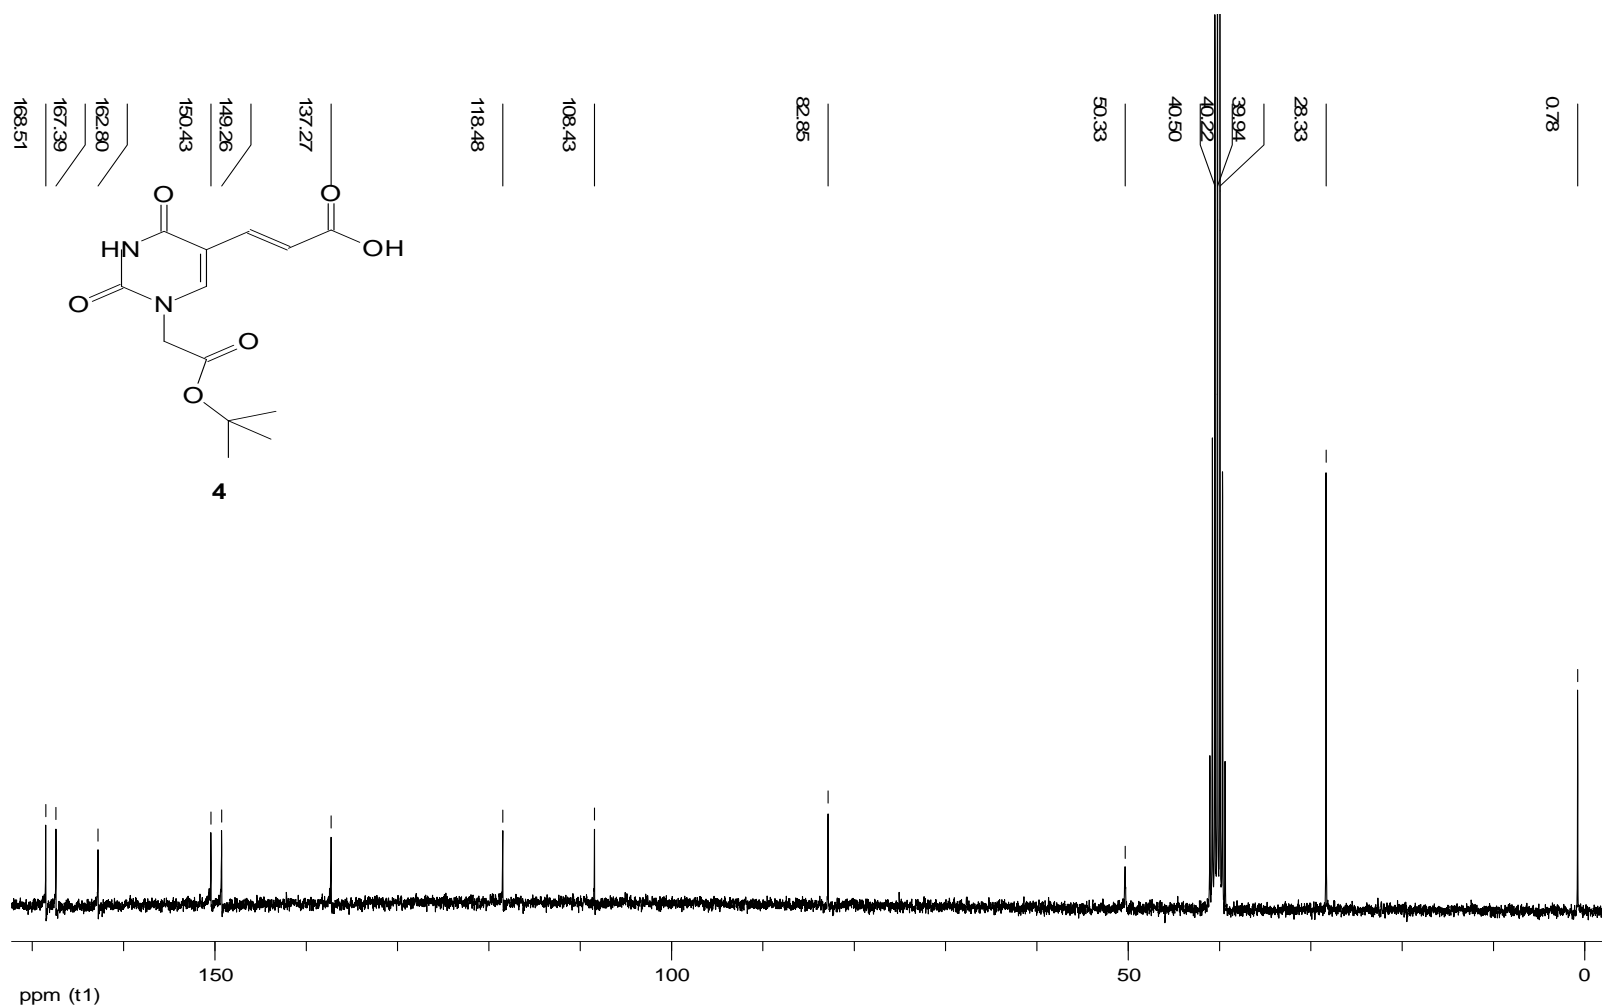

Figure S4.  $^{13}\text{C}$  NMR (300 MHz,  $\text{DMSO-d}_6$ ) spectrum of (E)-3-(1-(2-tert-butoxy-2-oxoethyl)-2,4-dioxo-1,2,3,4-tetrahydropyrimidin-5-yl)acrylic acid (4).

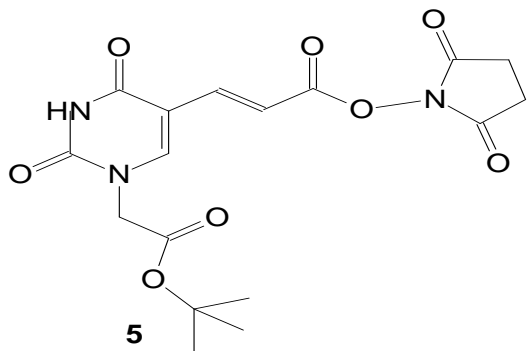

S6

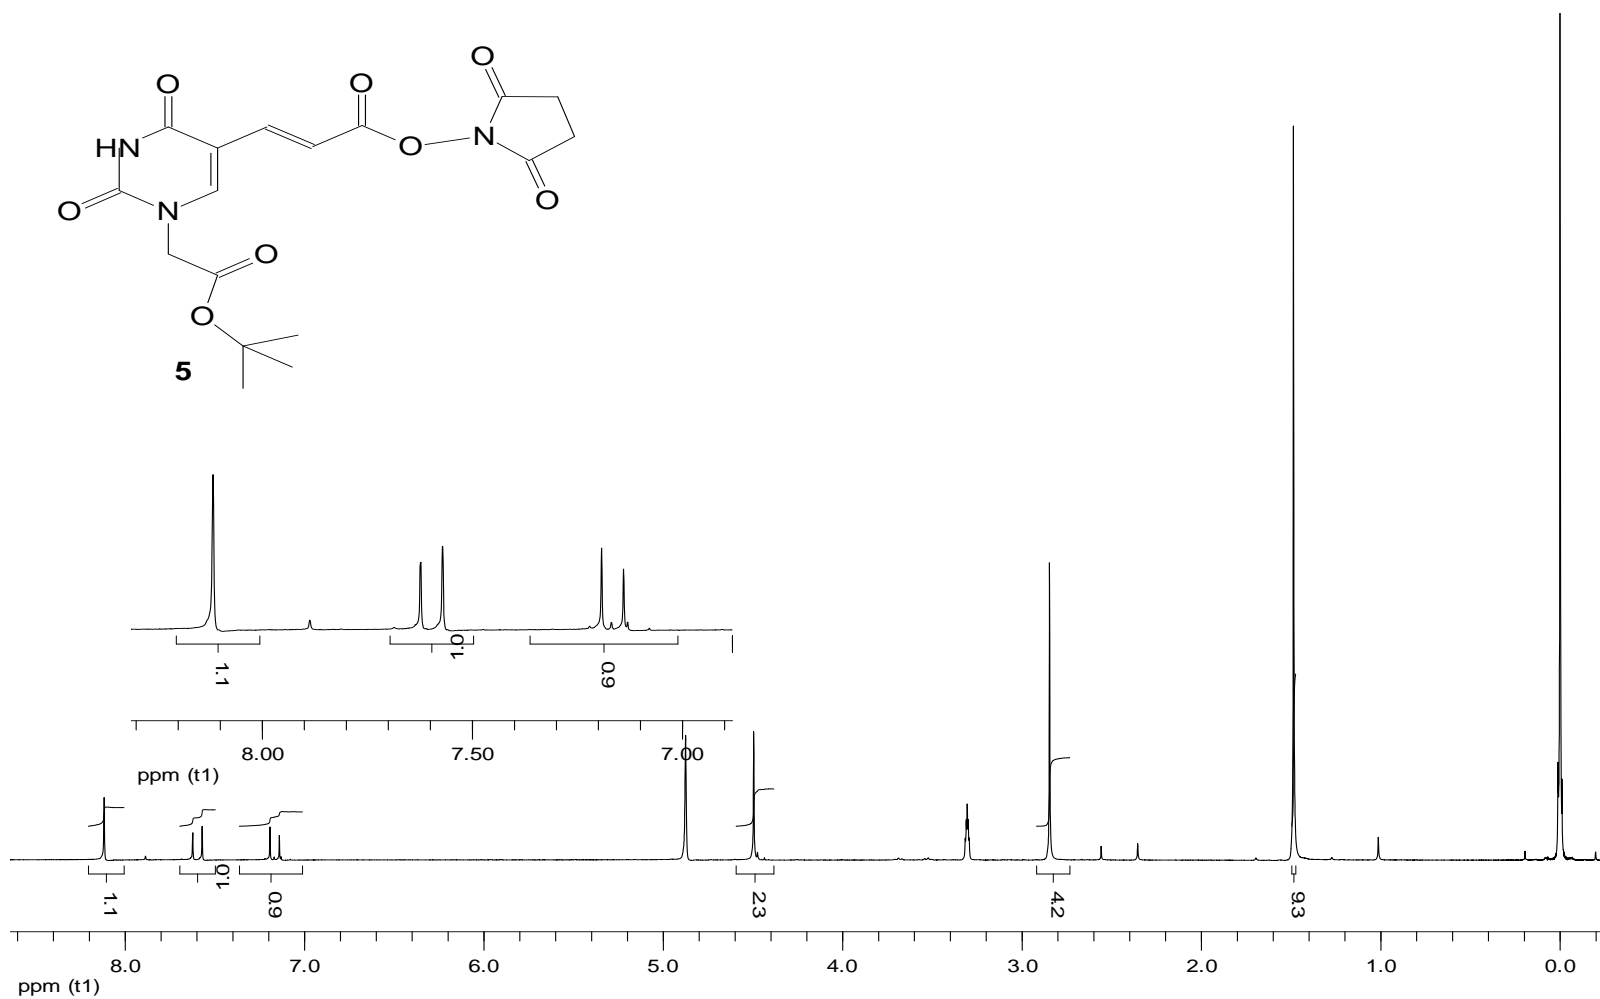

**Figure S5.**  $^1\text{H}$  NMR (300 MHz,  $\text{DMSO-d}_6$ ) spectrum of (E)-2,5-dioxopyrrolidin-1-yl-3-(1-(2-tert-butoxy-2-oxoethyl)-2,4-dioxo-1,2,3,4-tetrahydropyrimidin-5-yl)acrylate (**5**).

S7

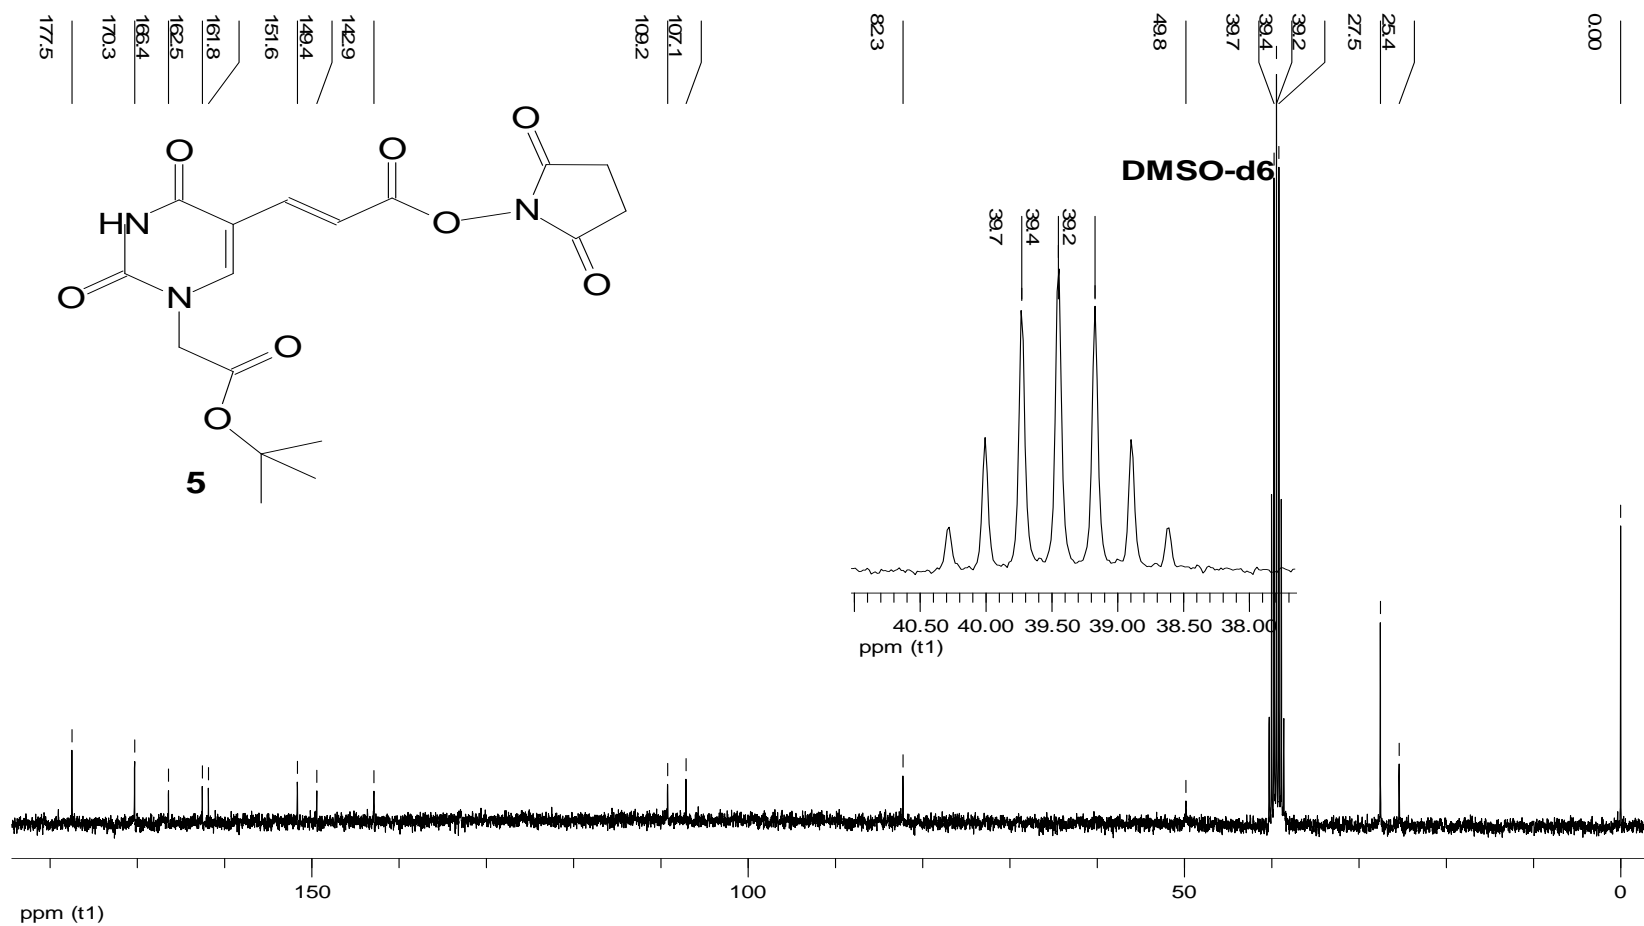

Figure S6. <sup>13</sup>C NMR (75 MHz, DMSO-d<sub>6</sub>) spectrum of (E)-2,5-dioxopyrrolidin-1-yl-3-(1-(2-tert-butoxy-2-oxoethyl)-2,4-dioxo-1,2,3,4-tetrahydropyrimidin-5-yl)acrylate (5).

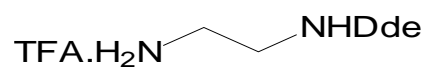

**6**

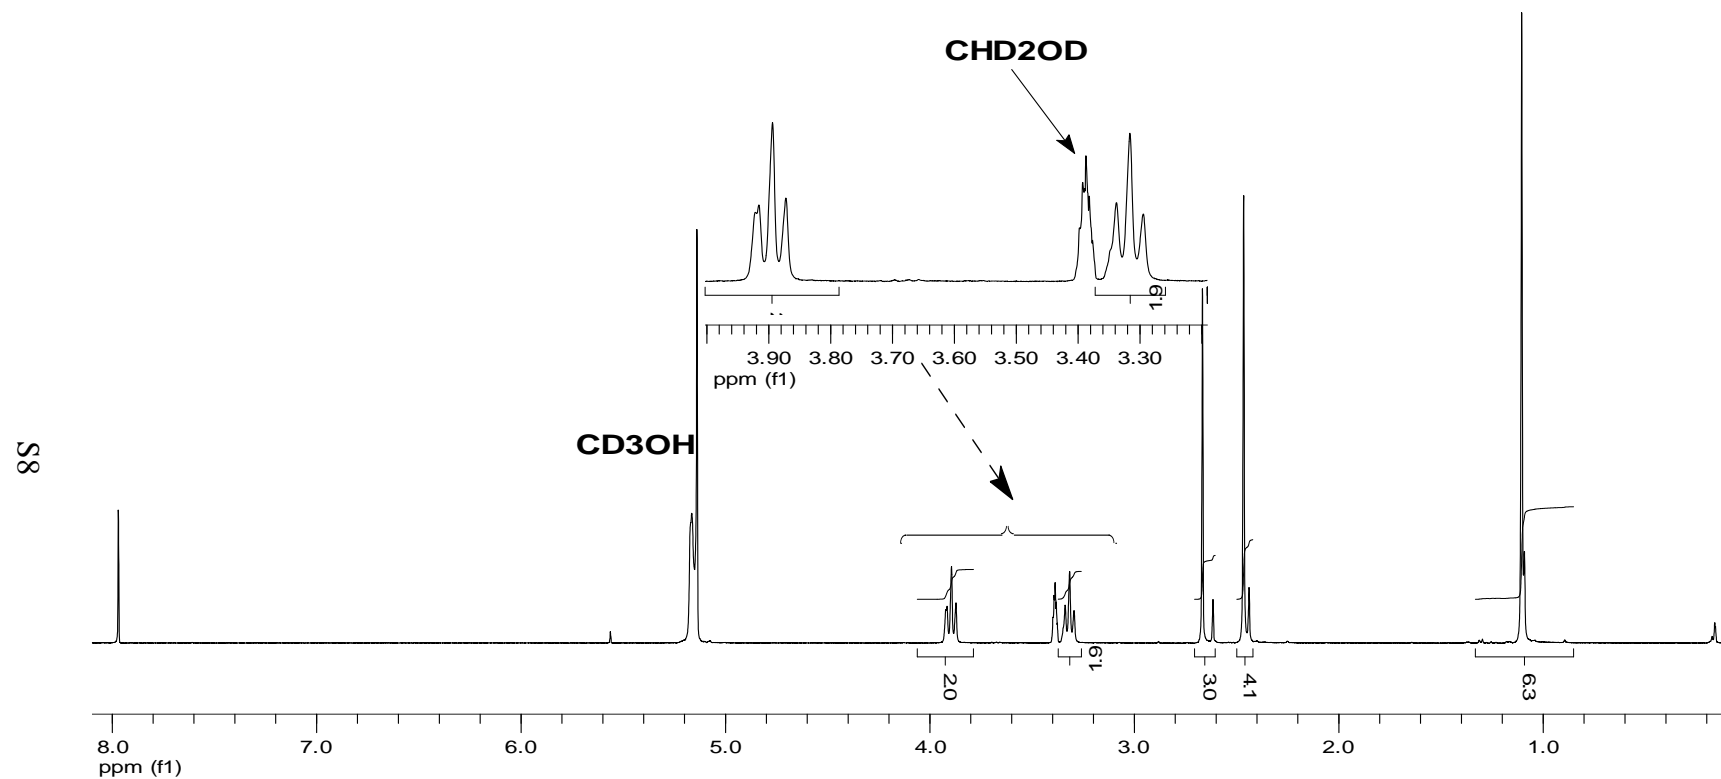

**Figure S7.** <sup>1</sup>H NMR (300 MHz, CD<sub>3</sub>OD) spectrum of Synthesis of 2-(1-(2-aminoethylamino)ethylidene)-5,5-dimethyl-1,3-cyclohexanedione (**6**).



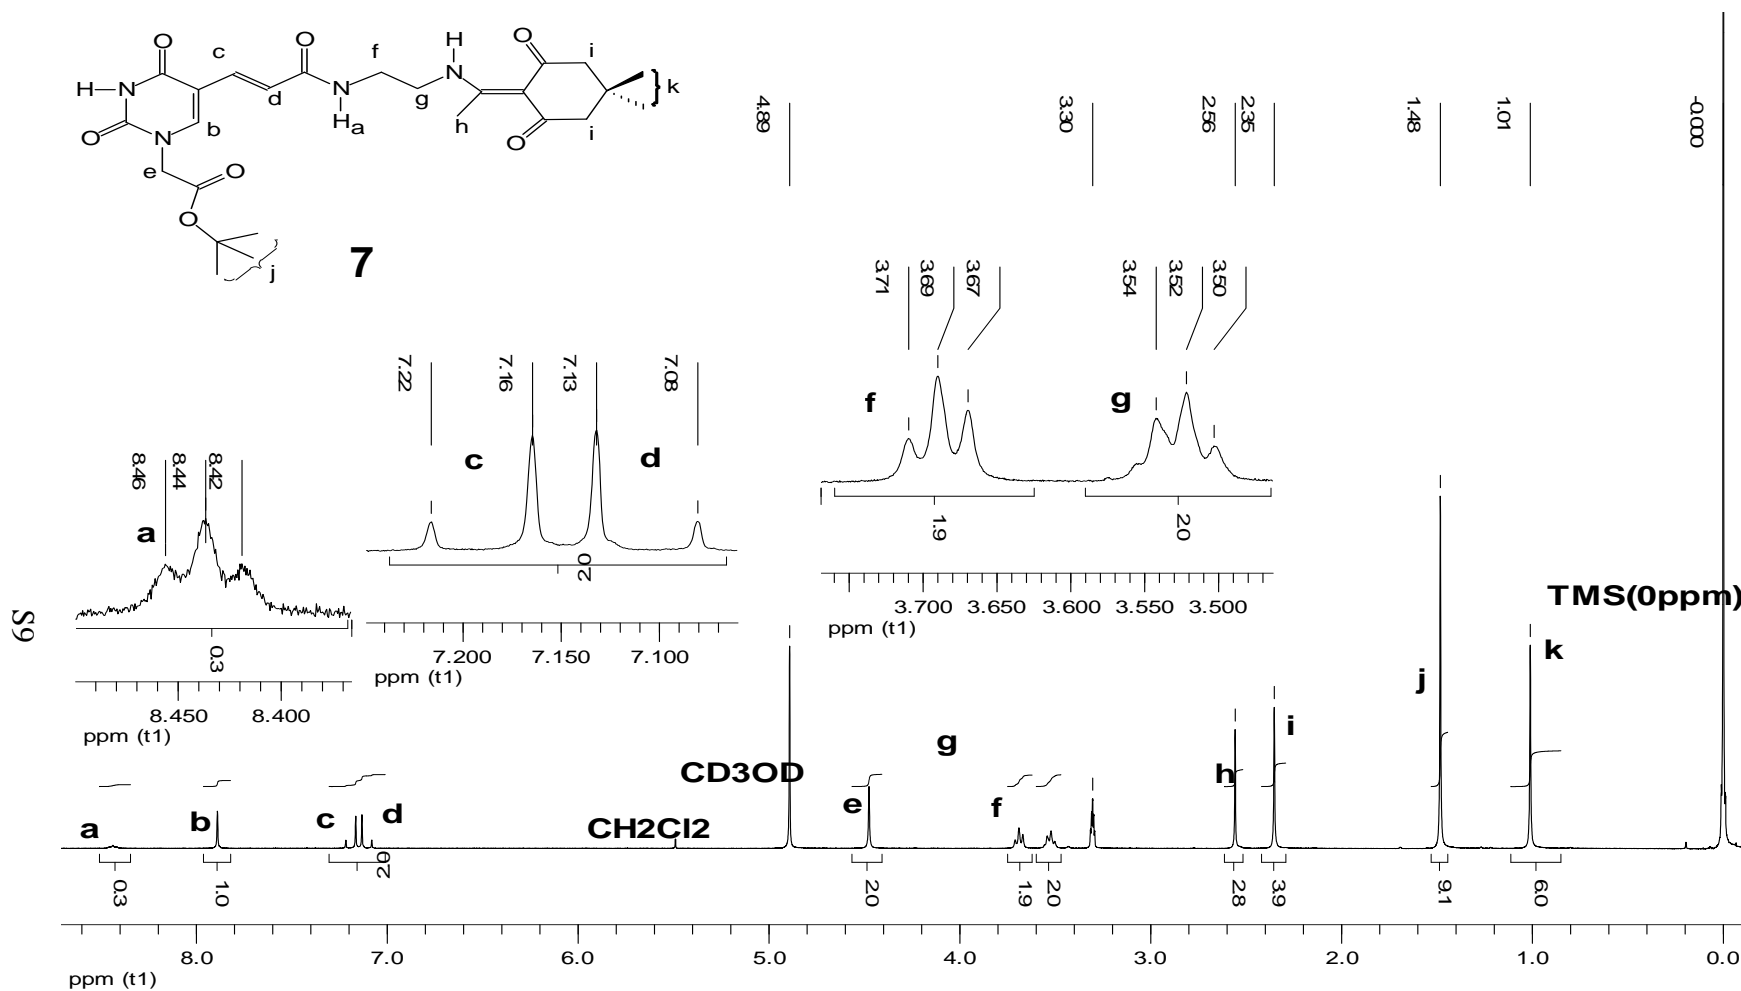

**Figure S8. <sup>1</sup>H NMR (300 MHz, CD<sub>3</sub>OD) spectrum of (E)-tert-butyl 2-(5-(3-(2-(1-(4,4-dimethyl-2,6-dioxocyclohexylidene)ethylamino)ethylamino)-3-oxoprop-1-enyl)-2,4-dioxo-3,4-dihydropyrimidin-1(2H)-yl)acetate (7).**

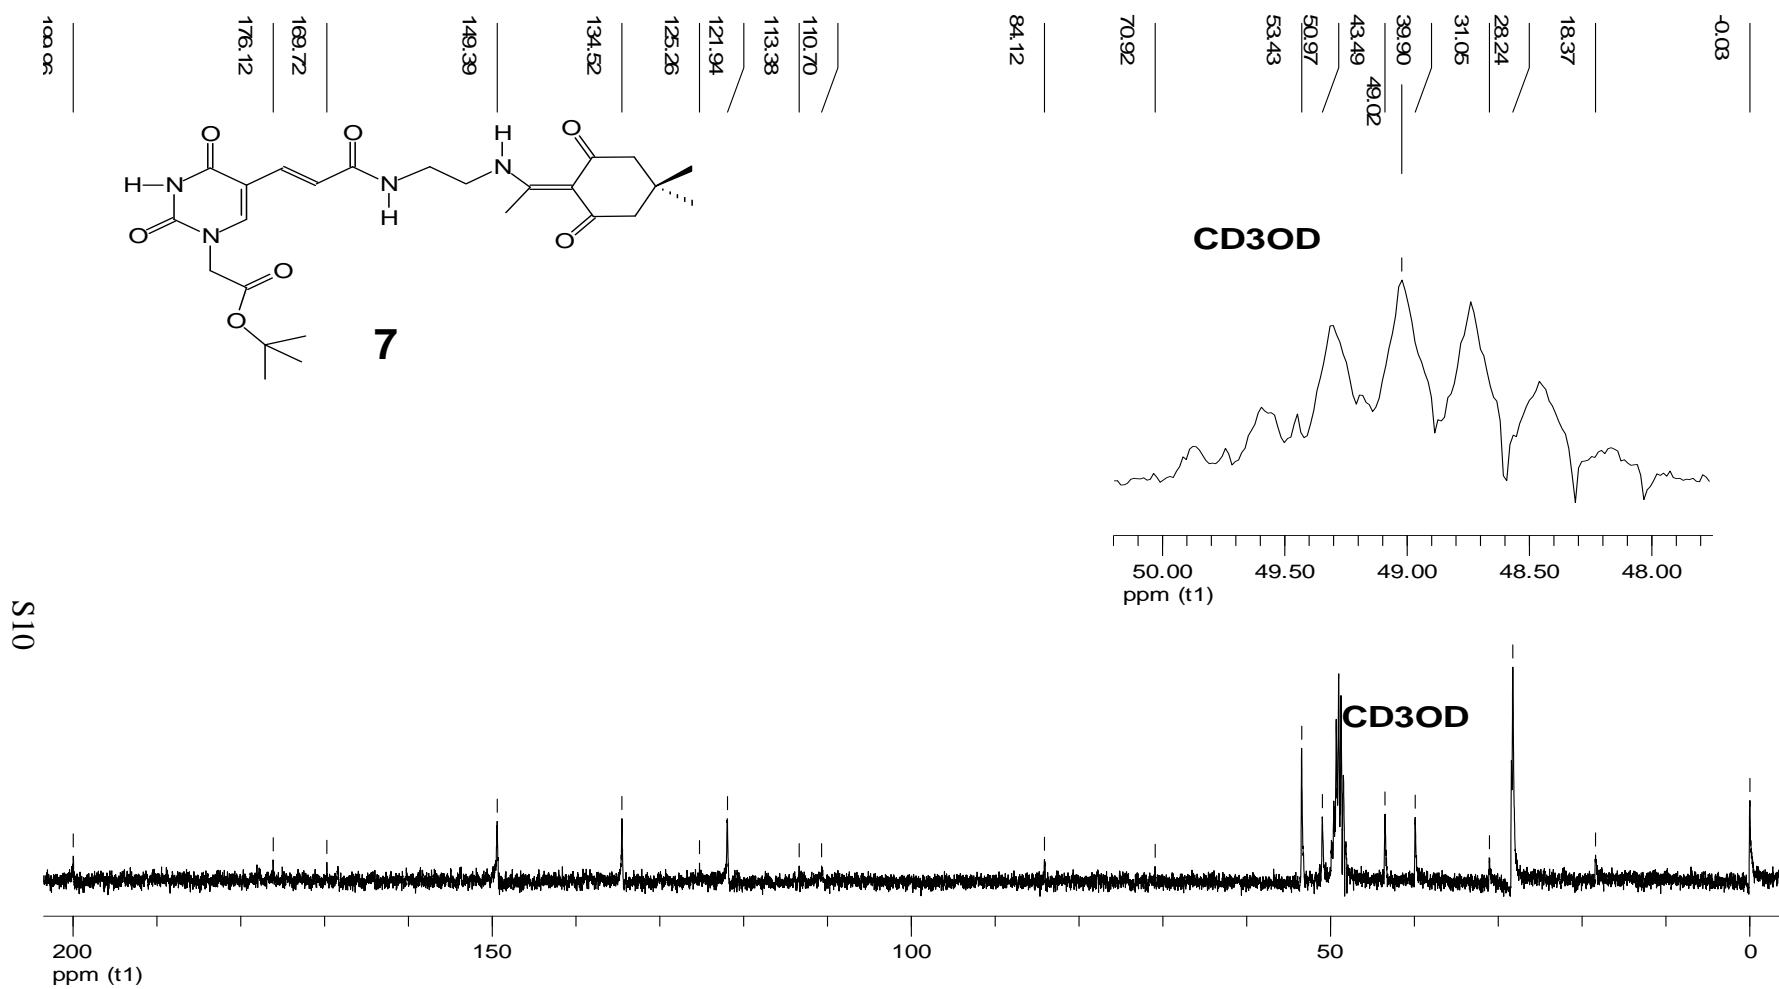

**Figure S9.**  $^{13}\text{C}$  NMR (75 MHz,  $\text{CD}_3\text{OD}$ ) spectrum of (E)-tert-butyl 2-(5-(3-(2-(1-(4,4-dimethyl-2,6-dioxocyclohexylidene)ethylamino)ethylamino)-3-oxoprop-1-enyl)-2,4-dioxo-3,4-dihydropyrimidin-1(2H)-yl)acetate (**7**).

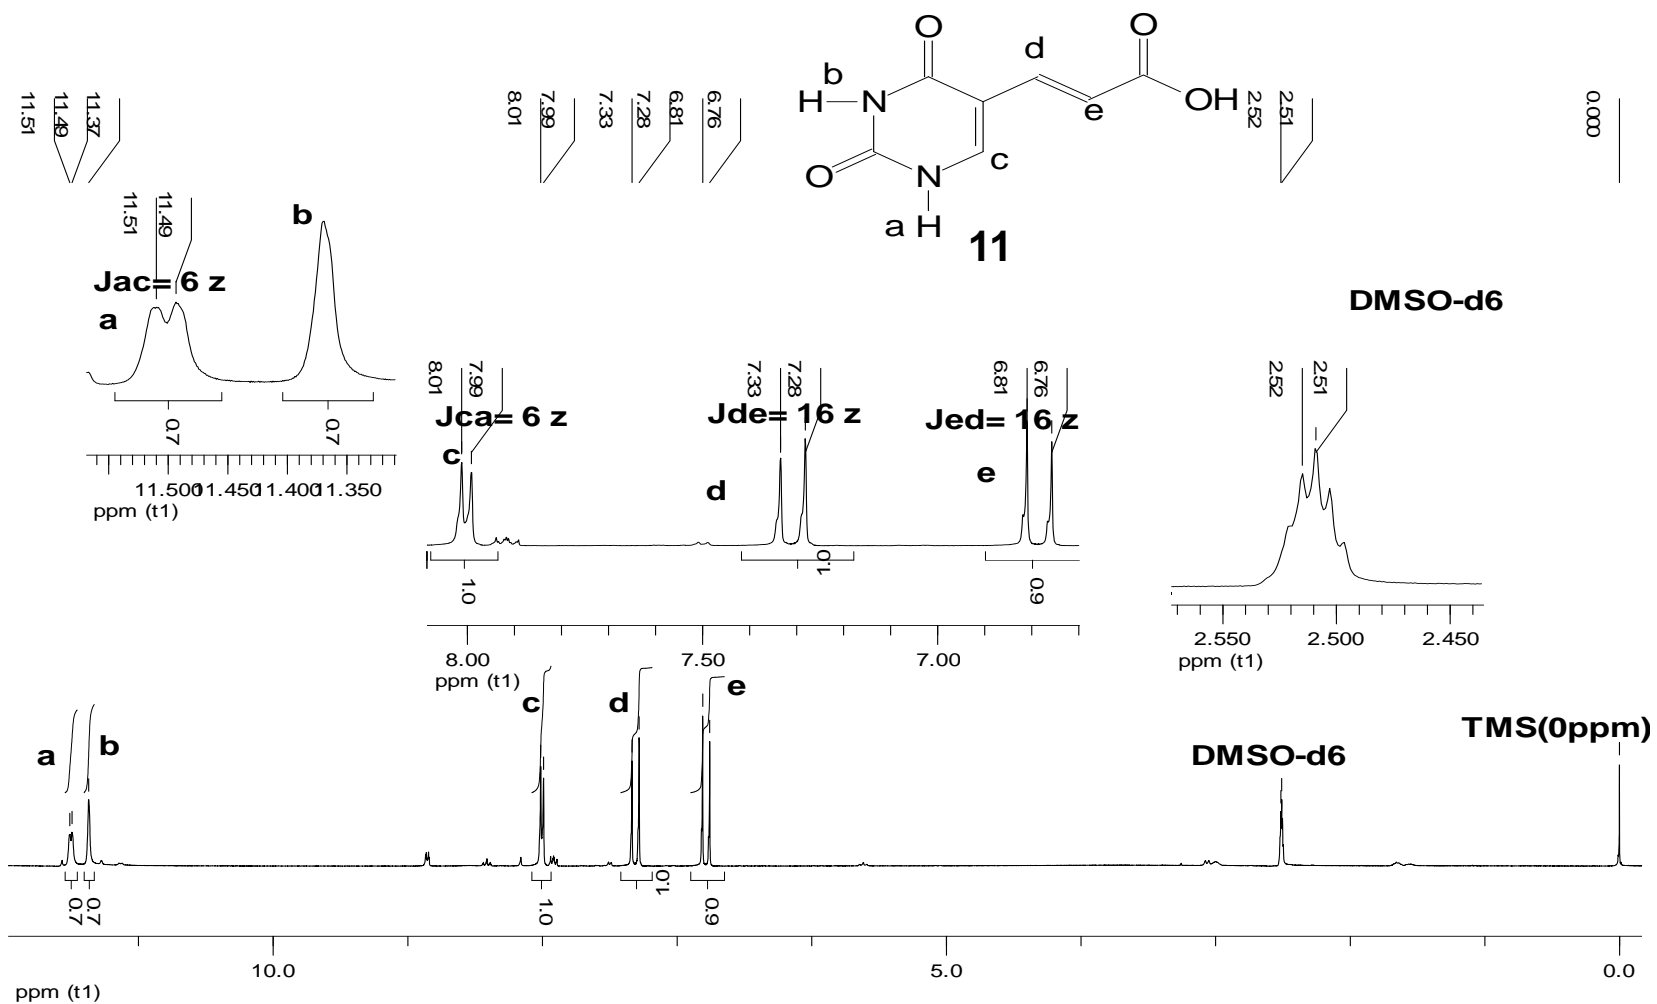

Figure S10. <sup>1</sup>H NMR(300 MHz, DMSO-d<sub>6</sub>) spectrum of (E)-3-(2,4-dioxo-1,2,3,4-tetrahydropyrimidin-5-yl)acrylic acid (11).

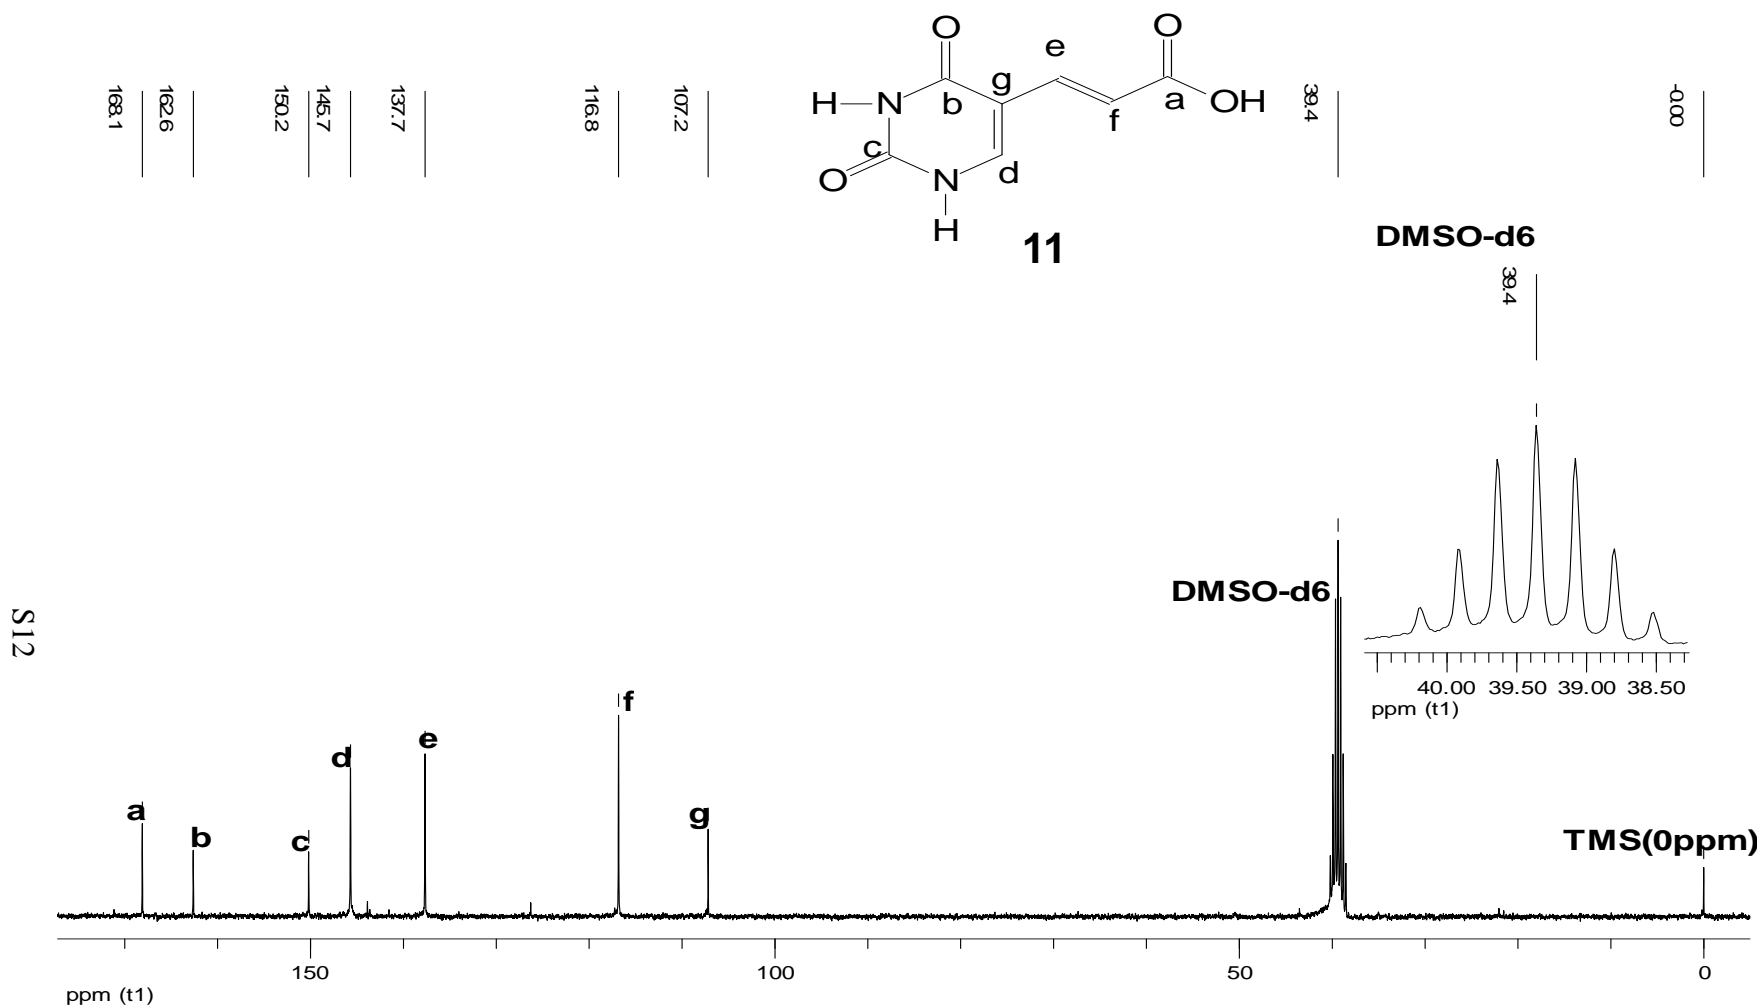

Figure S11. <sup>13</sup>C NMR(75 MHz, DMSO-d<sub>6</sub>) spectrum of (E)-3-(2,4-dioxo-1,2,3,4-tetrahydropyrimidin-5-yl)acrylic acid (11).

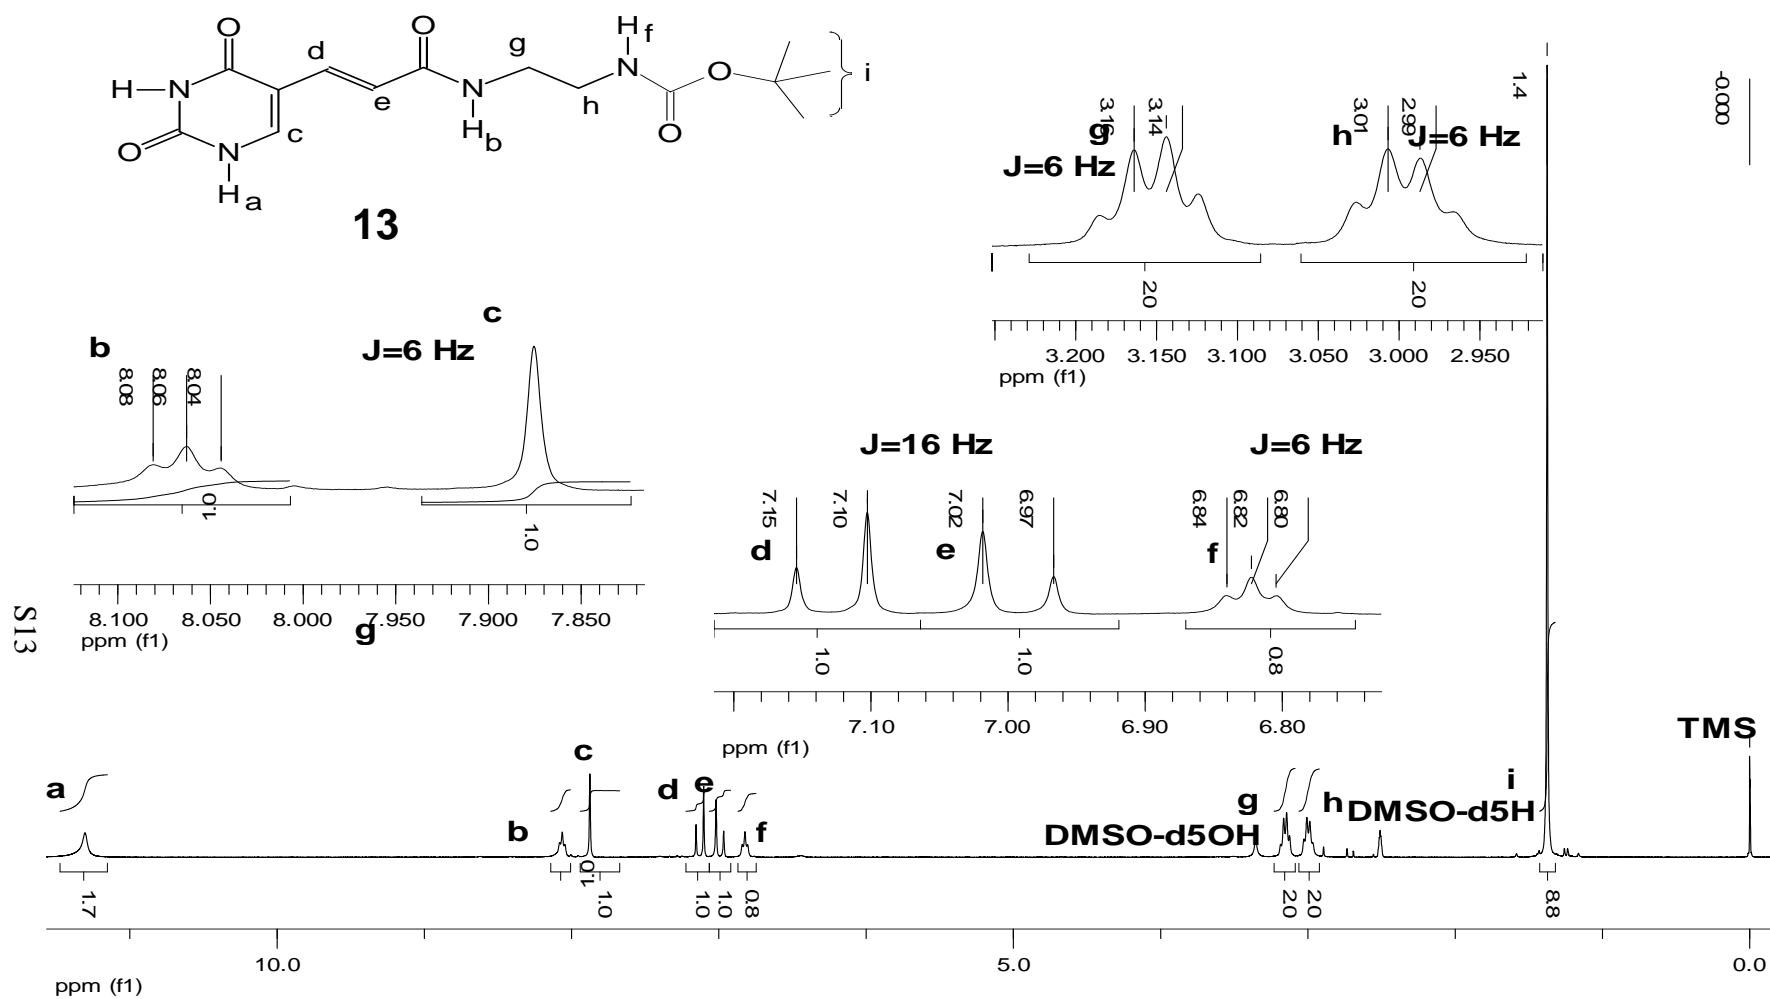

**Figure S12.**  $^1\text{H}$  NMR (300 MHz,  $\text{DMSO-d}_6$ ) spectrum of (E)-tert-butyl-2-(3-(2,4-dioxo-1,2,3,4-tetrahydropyrimidin-5-yl)acrylamido)ethylcarbamate (**13**).

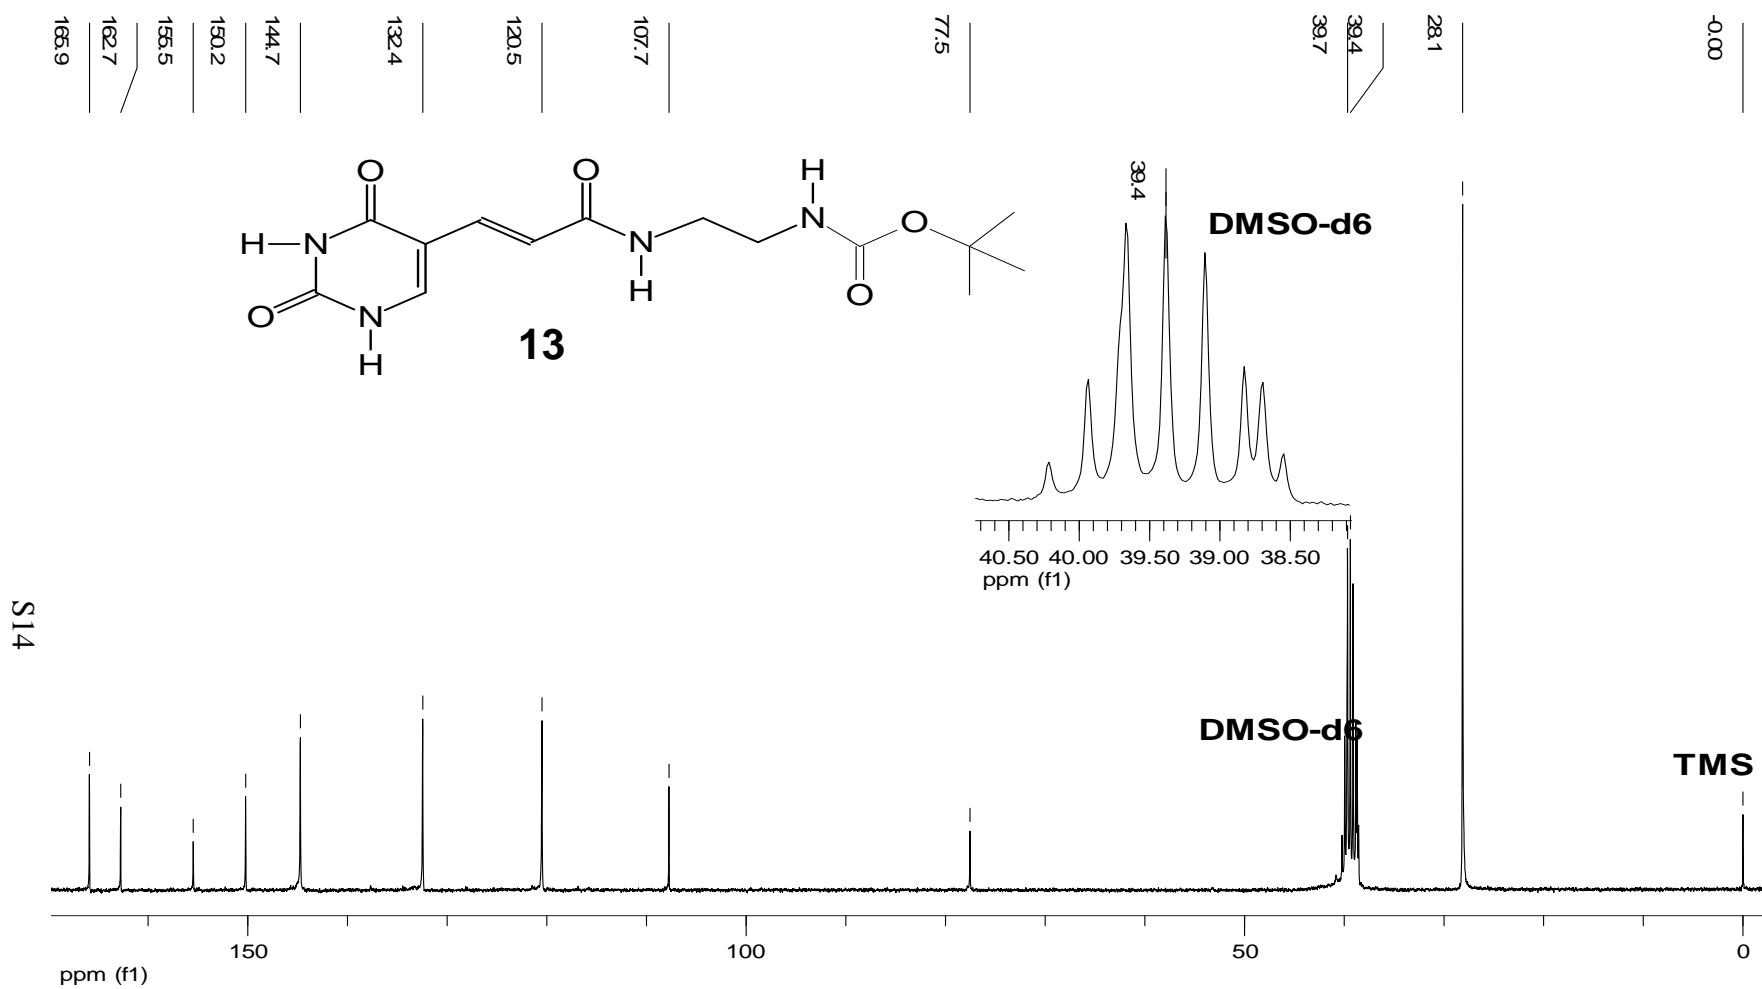

**Figure S13.**  $^{13}\text{C}$  NMR (75 MHz,  $\text{DMSO-d}_6$ ) spectrum of (*E*)-tert-butyl 2-(3-(2,4-dioxo-1,2,3,4-tetrahydropyrimidin-5-yl)acrylamido)ethylcarbamate (**13**).

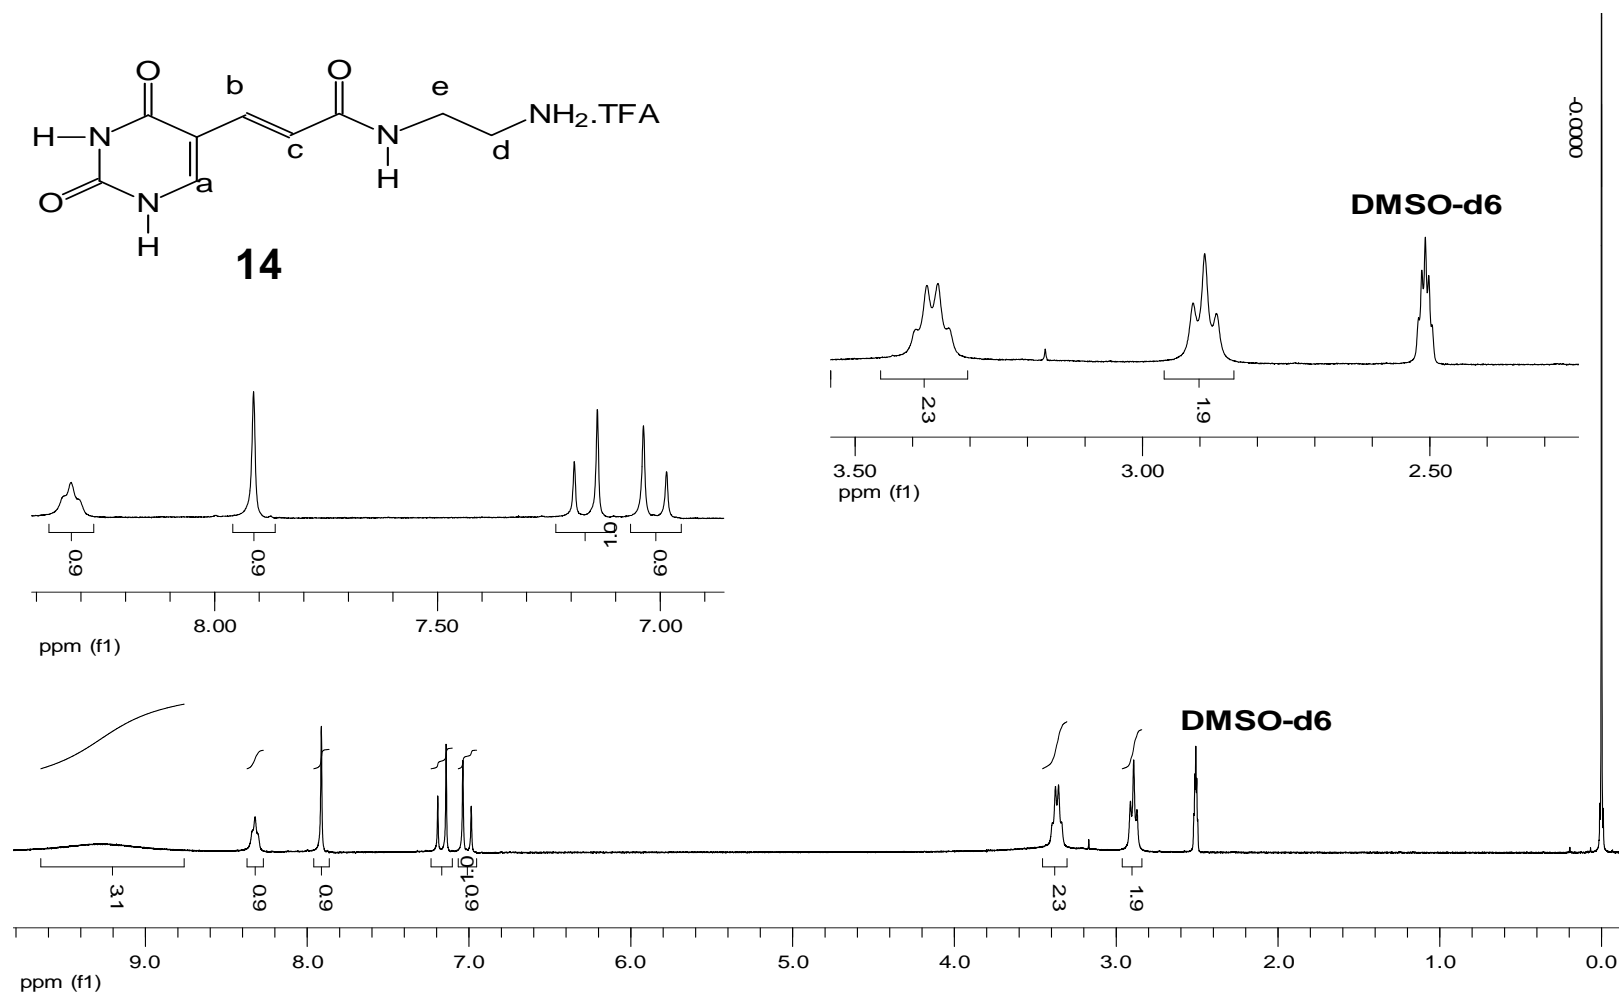

Figure S14. <sup>1</sup>H NMR (300 MHz, CD<sub>3</sub>OD) spectrum of (E)-N-(2-aminoethyl)-3-(2,4-dioxo-1,2,3,4-tetrahydropyrimidin-5-yl)acrylamide (**14**).

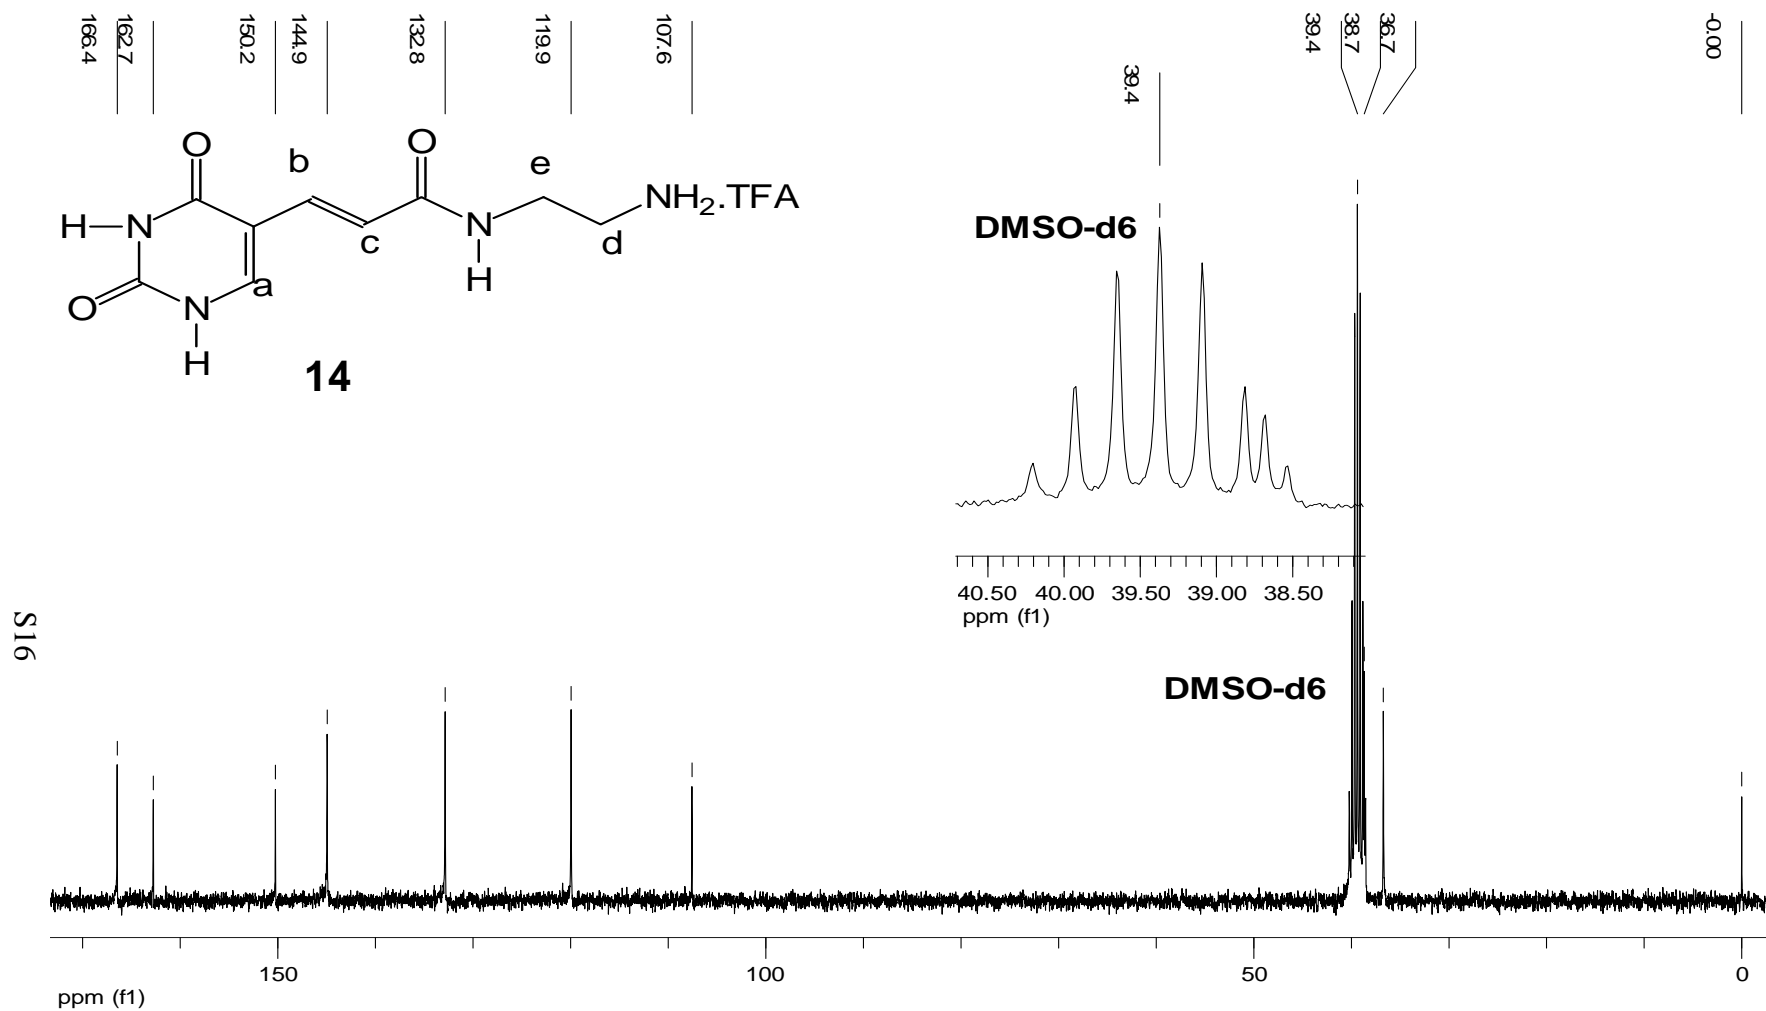

Figure S15. <sup>13</sup>C NMR (75 MHz, DMSO-d<sub>6</sub>) spectrum of (E)-N-(2-aminoethyl)-3-(2,4-dioxo-1,2,3,4-tetrahydropyrimidin-5-yl)acrylamide (13).



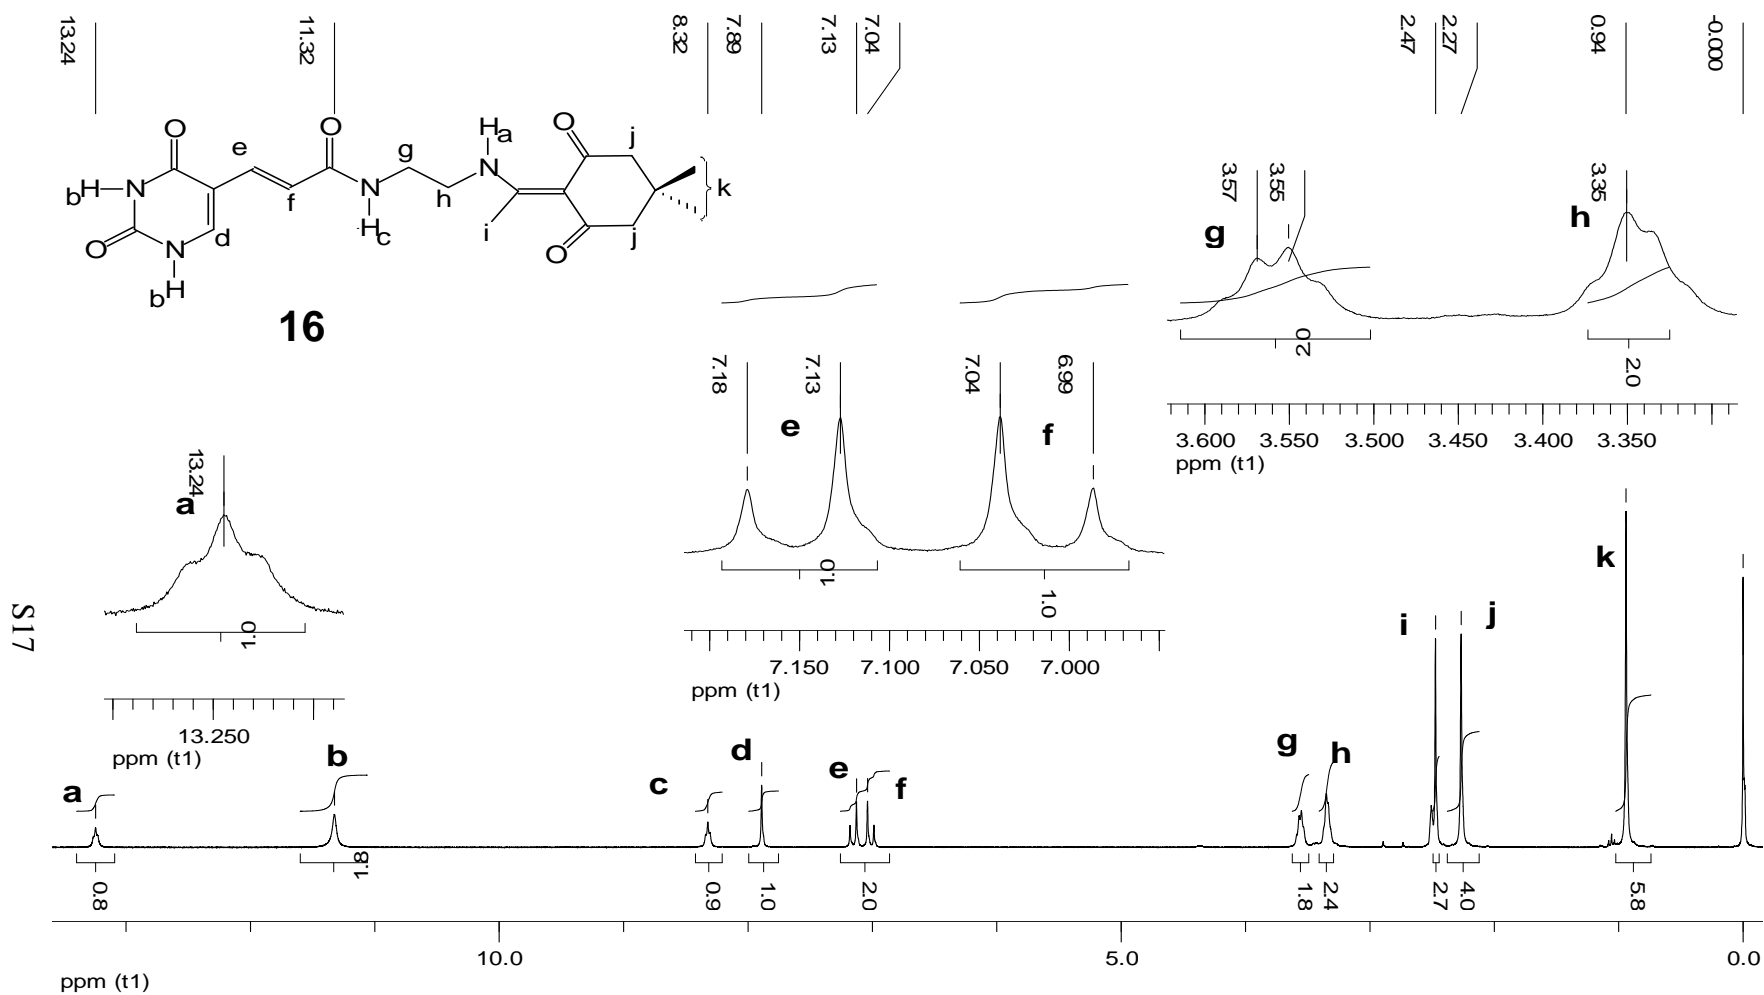

**Figure S16.**  $^1\text{H}$  NMR (300 MHz,  $\text{DMSO-d}_6$ ) spectrum of (E)-N-(2-(1-(4,4-dimethyl-2,6-dioxocyclohexylidene)ethylamino)-ethyl)-3-(2,4-dioxo-1,2,3,4-tetrahydropyrimidin-5-yl)acrylamide (**16**).

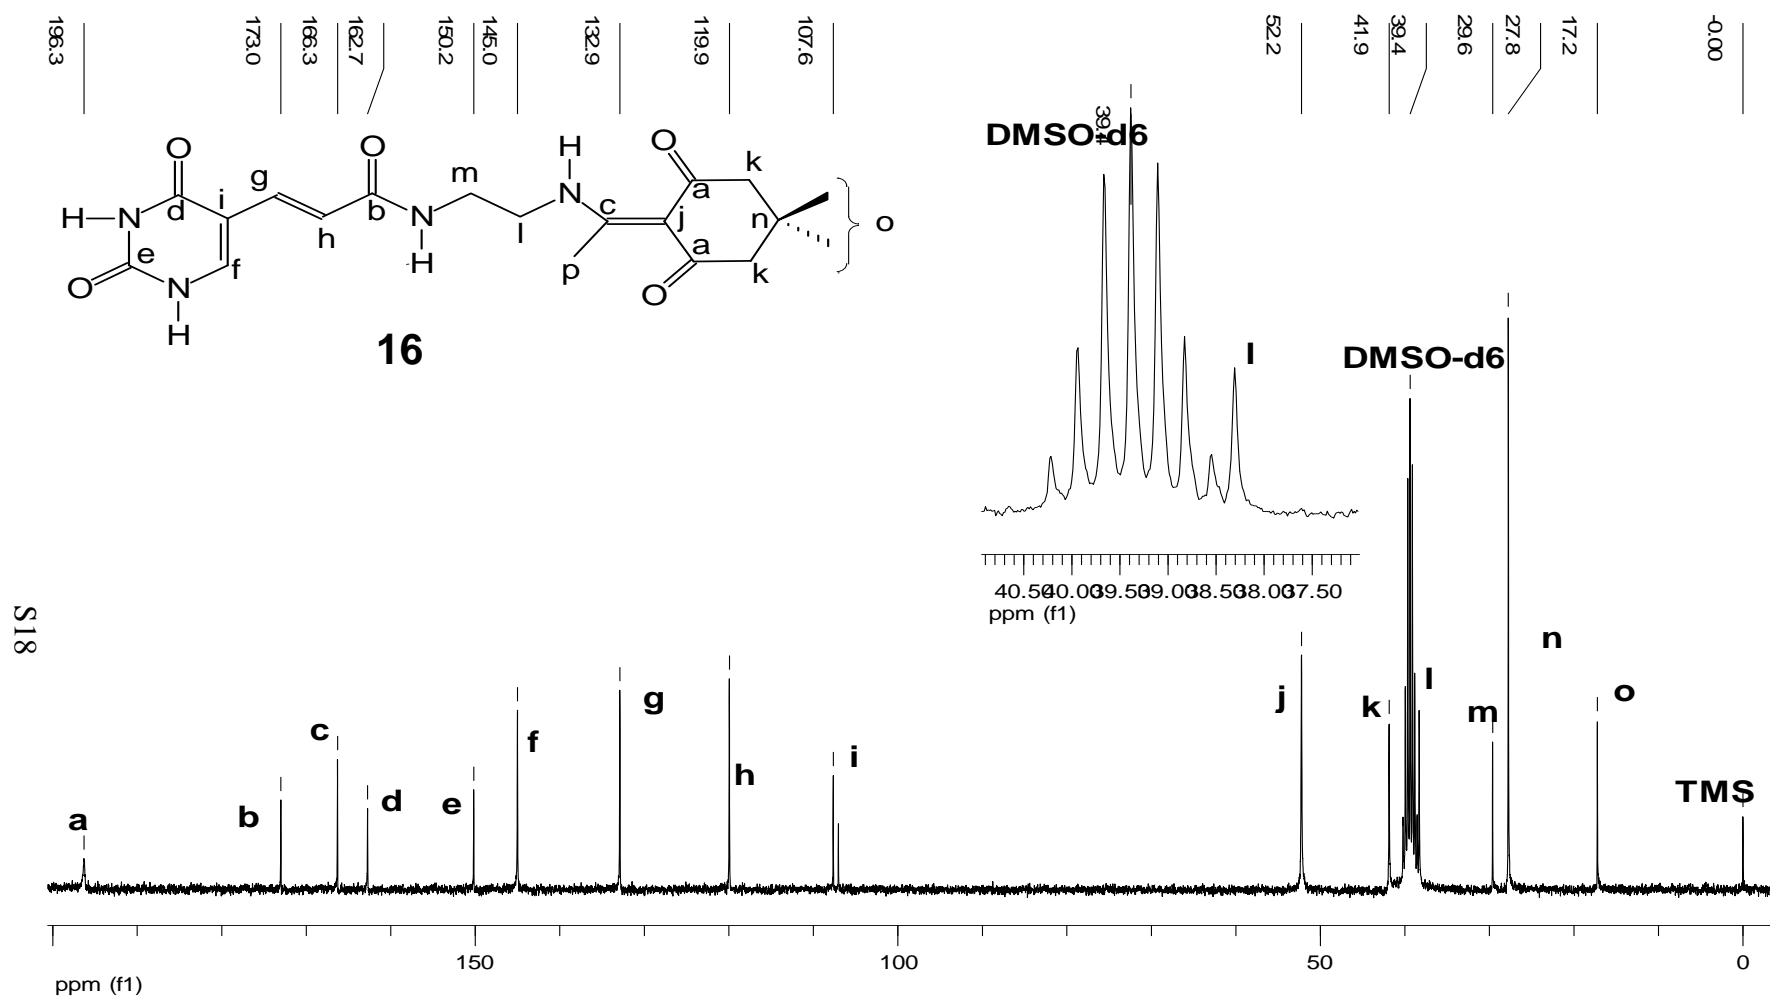

Figure S17.  $^{13}\text{C}$  NMR (75 MHz, DMSO- $\text{d}_6$ ) spectrum of (E)-N-(2-(1-(4,4-dimethyl-2,6-dioxocyclohexylidene)ethylamino)-ethyl)-3-(2,4-dioxo-1,2,3,4-tetrahydropyrimidin-5-yl)acrylamide (16).

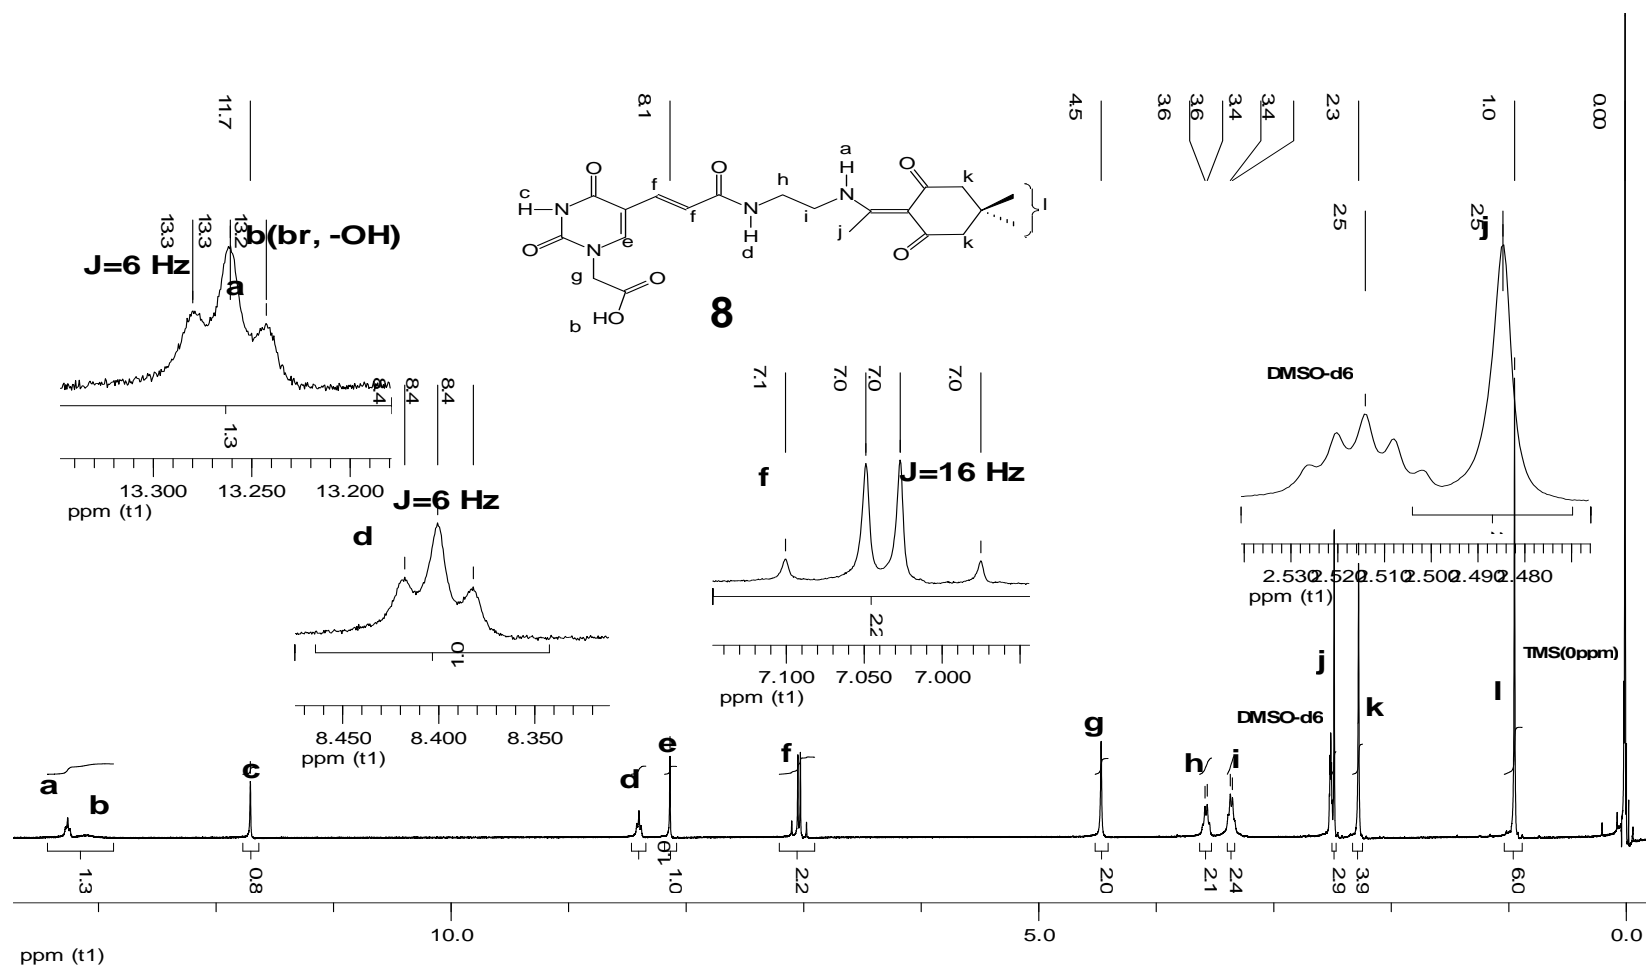

Figure S18.  $^1\text{H}$  NMR (300 MHz,  $\text{DMSO-d}_6$ ) spectrum of (E)-2-(5-(3-(2-(1-(4,4-dimethyl-2,6-dioxocyclohexylidene)ethylamino)ethylamino)-3-oxoprop-1-enyl)-2,4-dioxo-3,4-dihydropyrimidin-1(2H)-yl) acetic acid (**8**)

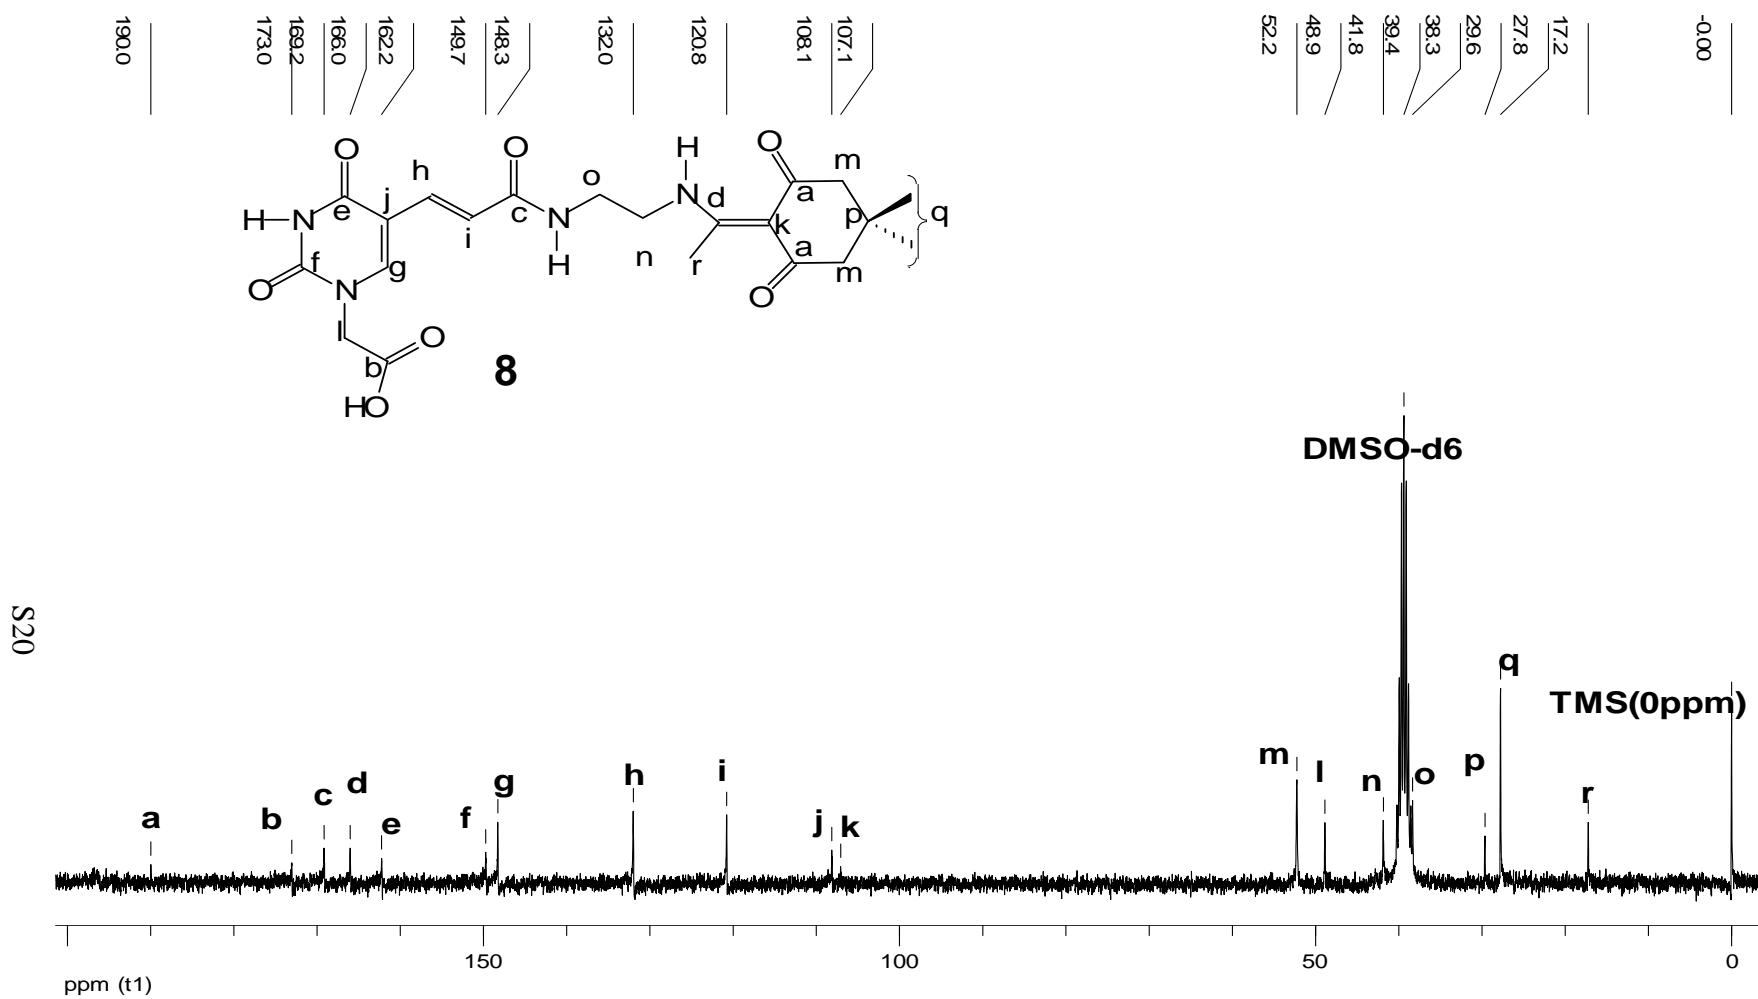

Figure S19.  $^{13}\text{C}$  NMR (75 MHz,  $\text{DMSO-d}_6$ ) spectrum of (E)-2-(5-(3-(2-(1-(4,4-dimethyl-2,6-dioxocyclohexylidene)ethylamino)ethylamino)-3-oxoprop-1-enyl)-2,4-dioxo-3,4-dihydropyrimidin-1(2H)-yl) acetic acid (**8**).

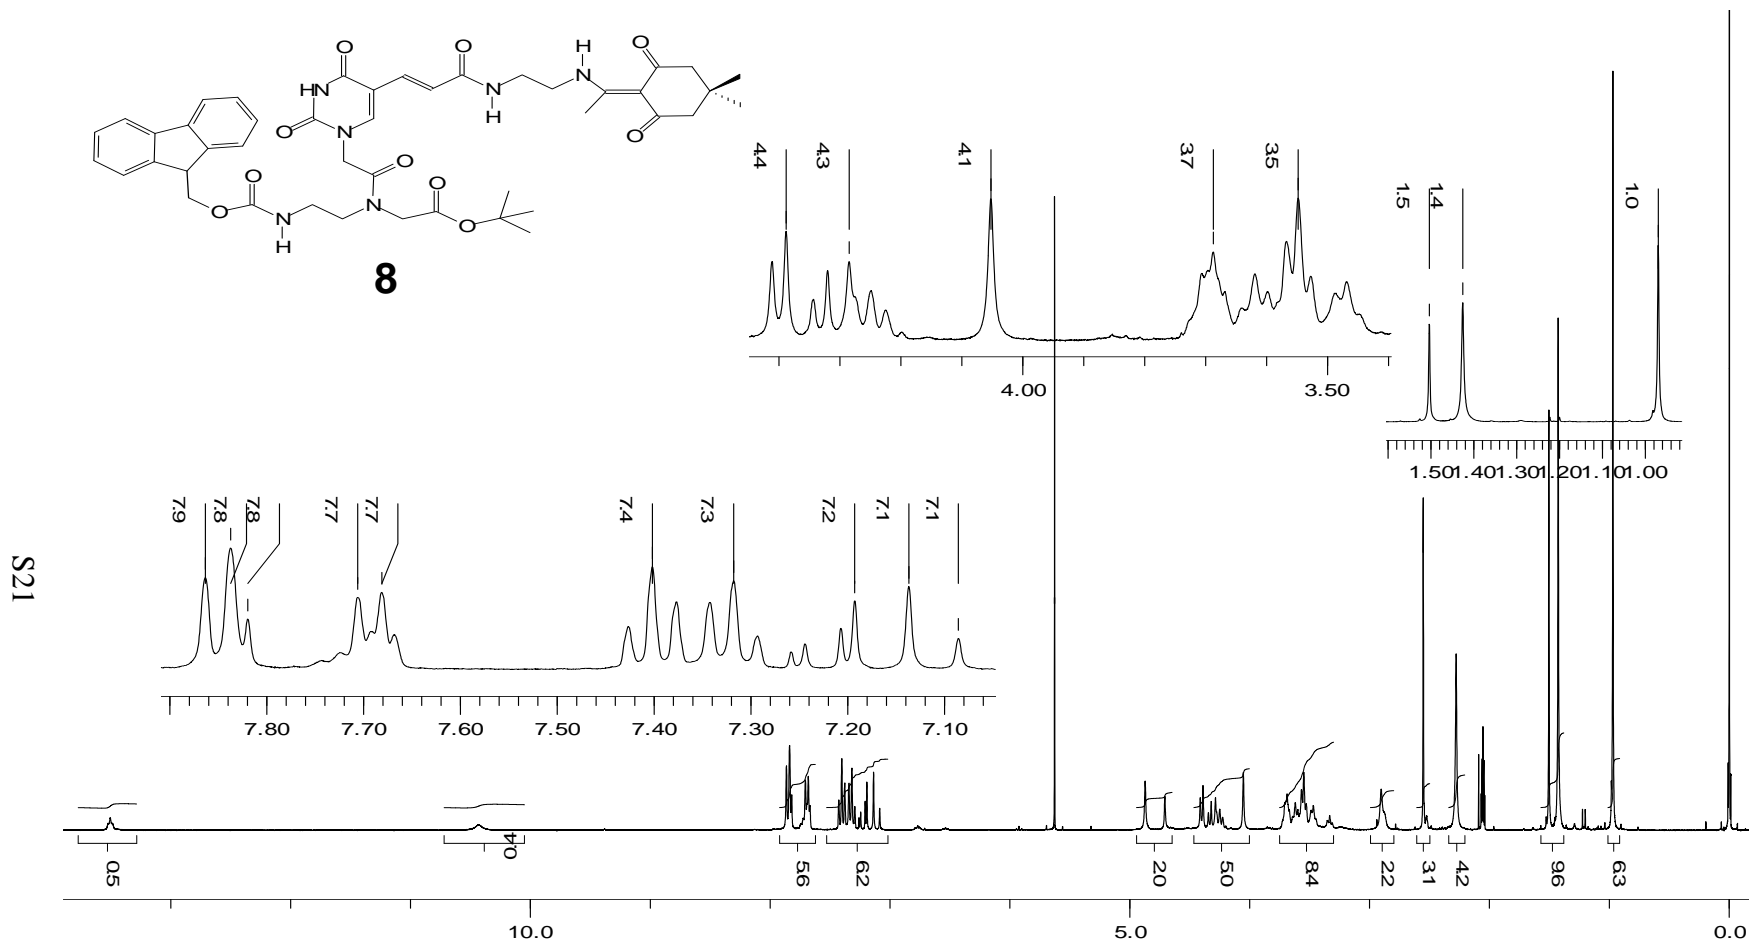

**Figure S20.**  $^1\text{H}$  NMR (300 MHz,  $\text{CD}_3\text{COCD}_3$ ) spectrum of (E)-tert-butyl 2-(N-(2-(((9H-fluoren-9-yl)methoxy)carbonylamino)ethyl)-2-(5-(3-(2-(1-(4,4-dimethyl-2,6-dioxocyclohexylidene)ethylamino)ethylamino)-3-oxoprop-1-enyl)-2,4-dioxo-3,4-dihydropyrimidin-1(2H)-yl)acetamido) acetate (**10**).

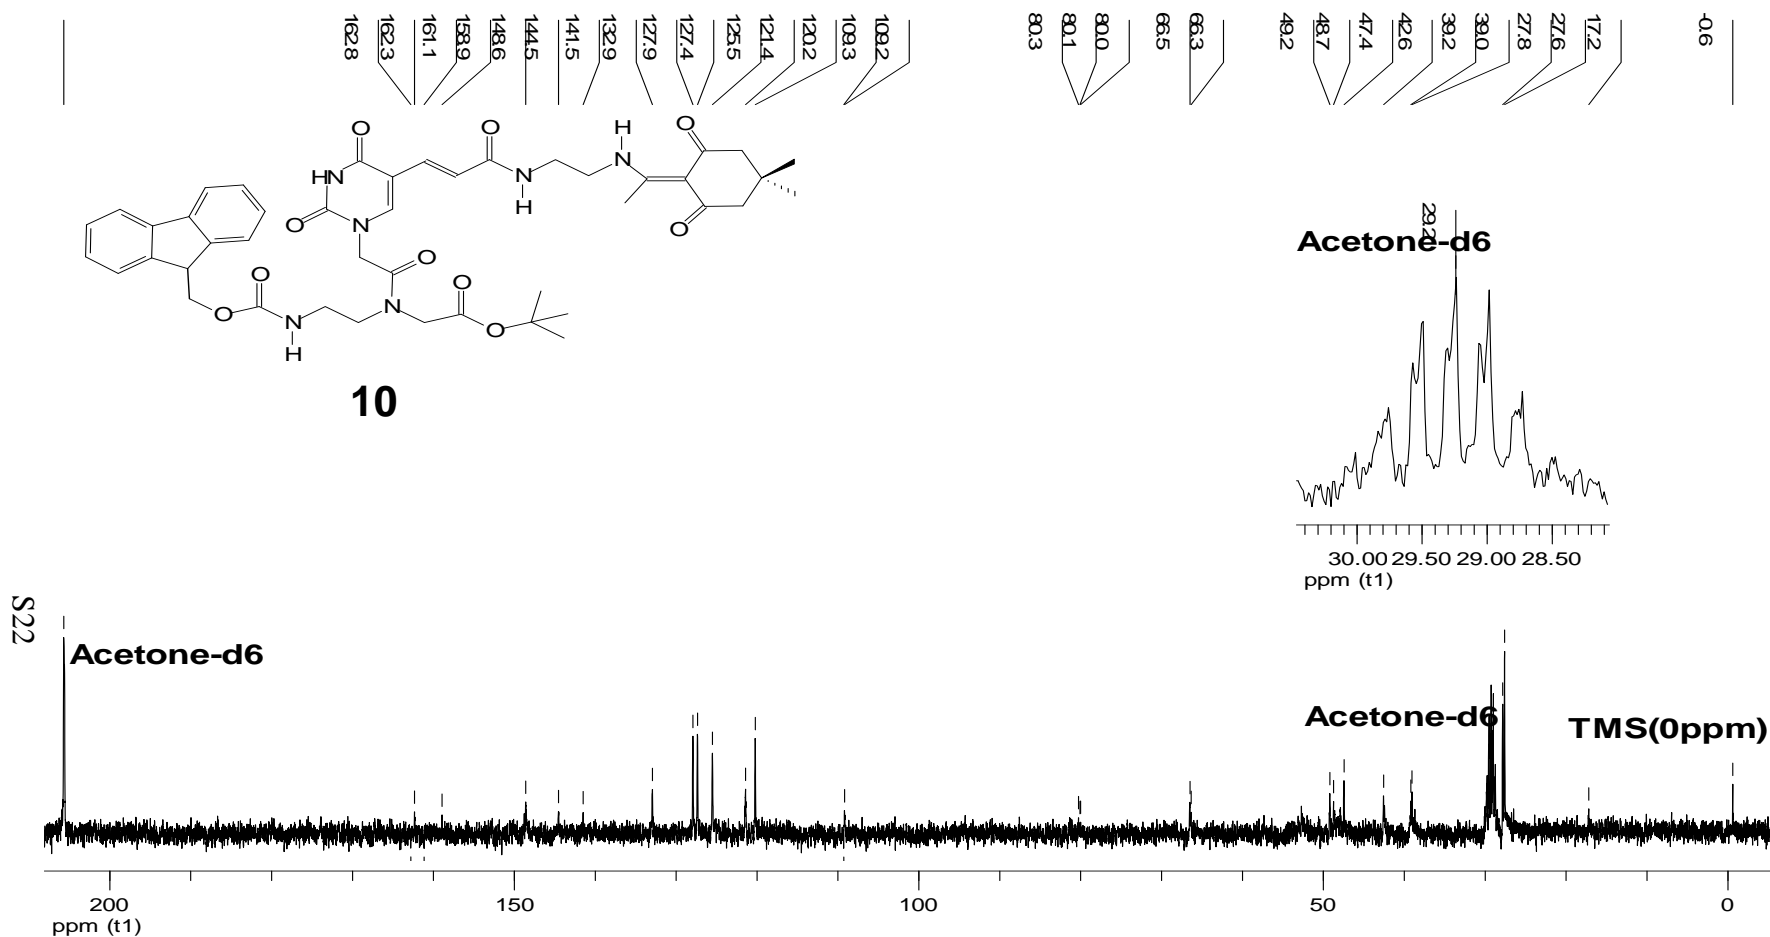

Figure S21.  $^{13}\text{C}$  NMR (75 MHz,  $\text{CD}_3\text{COCD}_3$ ) spectrum of (E)-tert-butyl 2-(N-(2-(((9H-fluoren-9-yl)methoxy)carbonyl)amino)ethyl)-2-(5-(3-(2-(1-(4,4-dimethyl-2,6-dioxocyclohexylidene)ethylamino)ethylamino)-3-oxoprop-1-enyl)-2,4-dioxo-3,4-dihydropyrimidin-1(2H)-yl)acetamido) acetate (**10**).

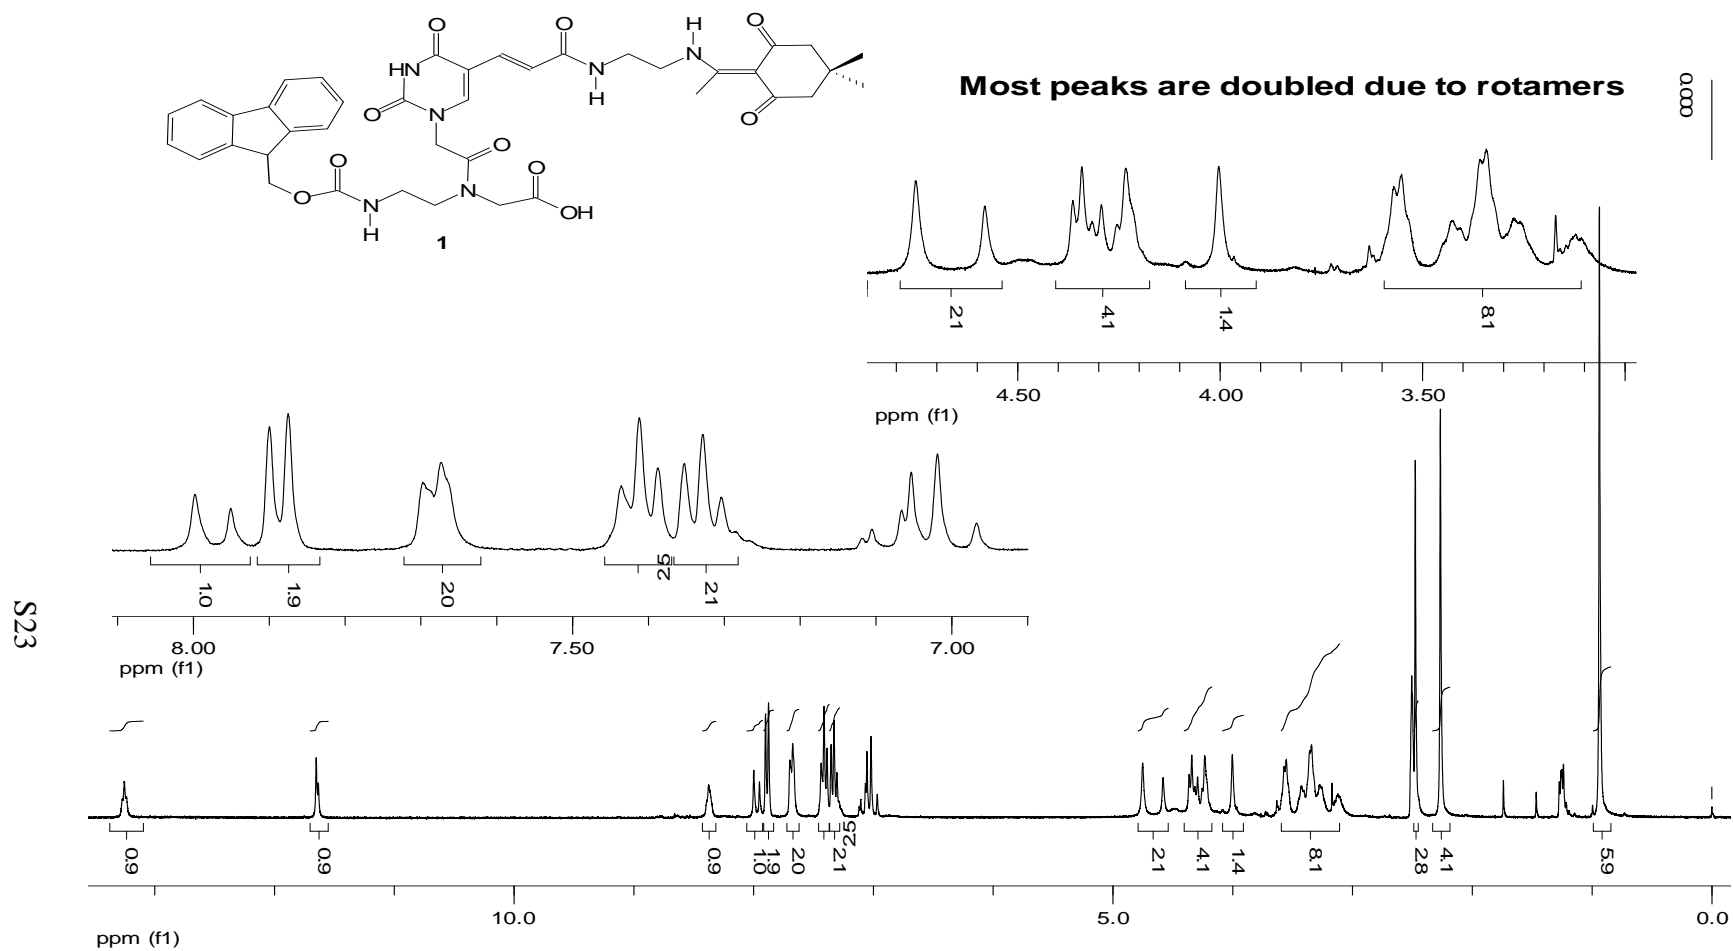

**Figure S22.** <sup>1</sup>H NMR (300 MHz, DMSO-d<sub>6</sub>) spectrum of (E)-2-(N-(2-(((9H-fluoren-9-yl)methoxy)carbonylamino)ethyl)-2-(5-(3-(2-(1-(4,4-dimethyl-2,6-dioxocyclohexylidene)ethylamino)ethylamino)-3-oxoprop-1-enyl)-2,4-dioxo-3,4-dihydropyrimidin-1(2H)-yl)acetamido)acetic acid; Fmoc-U' (Dde)-OH (**1**).

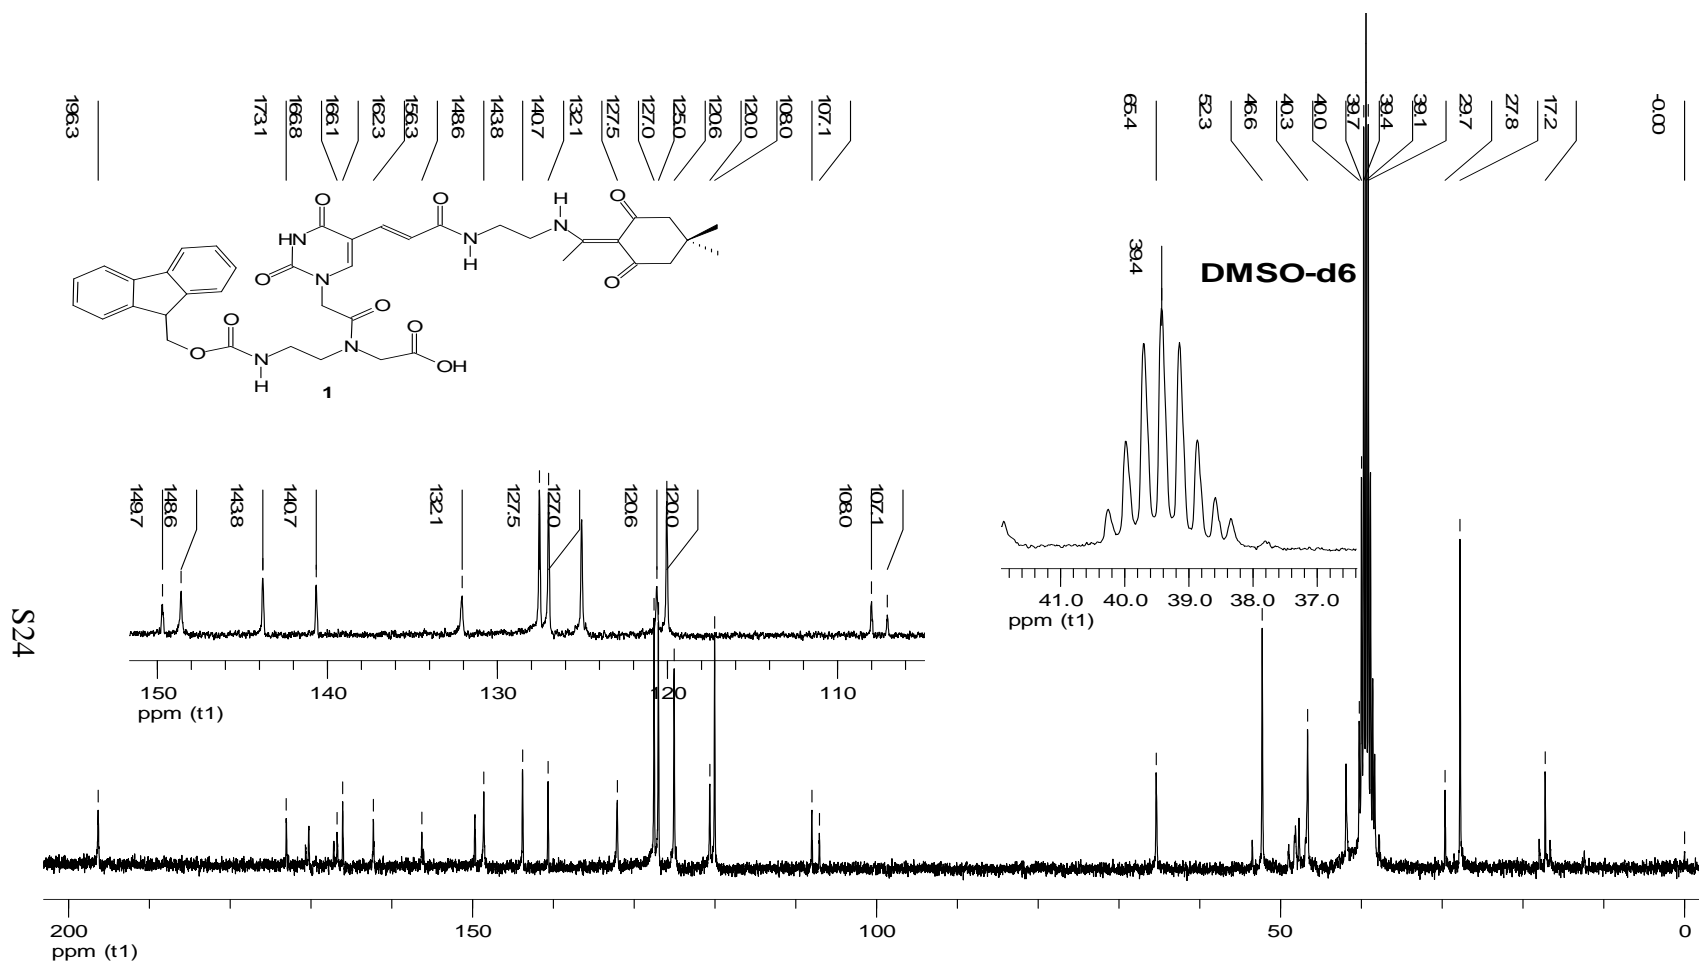

**Figure S23.** <sup>13</sup>C NMR (75 MHz, DMSO-d<sub>6</sub>) spectrum of (E)-2-(N-(2-(((9H-fluoren-9-yl)methoxy)carbonylamino)ethyl)-2-(5-(3-(2-(1-(4,4-dimethyl-2,6-dioxocyclohexylidene)ethylamino)ethylamino)-3-oxoprop-1-enyl)-2,4-dioxo-3,4-dihydropyrimidin-1(2H)-yl)acetamido)acetic acid; Fmoc-U' (Dde)-OH (1).
